1 **The necrotrophic fungus *Macrophomina phaseolina* induces oxidative stress-associated genes**  
2 **and related biochemical responses in charcoal rot susceptible sorghum genotypes**

3

4 Ananda Y. Bandara., Dilooshi K. Weerasooriya., Sanzhen Liu., and Christopher R. Little\*

5

6

7 Ananda Y. Bandara (anandayb@ksu.edu), Sanzhen Liu (liu3zhen@ksu.edu) and Christopher R.

8 Little (crlittle@ksu.edu): Department of Plant Pathology, Kansas State University, Manhattan, KS,

9 66506, USA., Dilooshi K Weerasooriya (dilooshi@ksu.edu): Department of Agronomy, Kansas

10 State University, Manhattan, KS, 66506, USA

11

12

13

14 \*Corresponding author: Christopher R Little

15

16

17 **ABSTRACT**

18

19 *Macrophomina phaseolina* (MP) is a necrotrophic fungus that causes charcoal rot disease in  
20 sorghum [*Sorghum bicolor* (L.) Moench]. The host resistance and susceptibility mechanisms for  
21 this disease are poorly understood. Here, the transcriptional and biochemical aspects of the  
22 oxidative stress and antioxidant system of charcoal rot resistant and susceptible sorghum  
23 genotypes in response to MP inoculation were investigated. RNA sequencing revealed 96  
24 differentially expressed genes between resistant (SC599) and susceptible (Tx7000) genotypes that  
25 are related to the host oxidative stress and antioxidant system. Follow-up functional experiments  
26 demonstrated MP's ability to significantly increase reactive oxygen (ROS) and nitrogen species  
27 (RNS) content in the susceptible genotypes. This was confirmed by increased malondialdehyde  
28 content, an indicator of ROS/RNS-mediated lipid peroxidation. The presence of nitric oxide (NO)  
29 in stalk tissues of susceptible genotypes was confirmed using a NO-specific fluorescent probe  
30 (DAF-FM DA) and visualized by confocal microscopy. Inoculation significantly increased  
31 peroxidase activity in susceptible genotypes while catalase activity was significantly higher in MP-  
32 inoculated resistant genotypes. MP inoculation significantly reduced superoxide dismutase activity  
33 in all genotypes. These findings suggested MP's ability to promote a host-derived oxidative stress  
34 response in susceptible sorghum genotypes, which contributes to induced cell death-associated  
35 disease susceptibility to this necrotrophic phytopathogen.

36

37

38

39

40 **INTRODUCTION**

41

42 Plants defend themselves from pathogens using numerous defense mechanisms. Pathogen-  
43 associated molecular patterns (PAMPs) are elicited by plants as a less specific recognition system  
44 to prevent pathogen invasion, to restrict pathogen growth, and contribute to basal defense (Jones  
45 and Dangl 2006). Plants produce resistance proteins in response to pathogen infections that  
46 overcome basal defense. These proteins promote inducible defense responses often characterized  
47 by a hypersensitive response (HR)-associated host cell death upon pathogen recognition. HR  
48 constrains the invasion of biotrophic pathogens and subsequent pathogen growth as biotrophs  
49 derive their energy requirements from living host cells. Necrotrophic pathogens, on the other hand,  
50 actively kill host tissue as they colonize and obtain nutrients from dead or dying cells (Stone 2001).  
51 Therefore, any mechanism that results in host cell death including HR is beneficial for necrotroph  
52 pathogenesis. Cell death during HR is dependent upon the balanced production of nitric oxide  
53 (NO) and reactive oxygen species (ROS) (Delledonne et al. 2001). Many necrotrophs produce  
54 ROS as virulence factors during colonization (Shetty et al. 2008). For example, the infection,  
55 colonization, and suppression of host defenses by the model necrotrophic fungus, *Botrytis cinerea*  
56 is due to the production of high levels of ROS (van Kan 2006; Choquer et al. 2007). *Macrophomina*  
57 *phaseolina* generates a flux of NO during the infection process of jute plant (Sarkar et al. 2014).

58

59 *M. phaseolina* has been reported to cause root and stalk rot in > 500 plant species (Islam et al.  
60 2012), including food crops (Su et al. 2001), pulse crops (Mayek-Pérez et al. 2001; Raguchander  
61 et al. 1993), fiber crops [jute (De et al. 1992), cotton (Aly et al. 2007)], and oil crops (Wyllie 1998).  
62 *M. phaseolina* causes charcoal rot disease in many economically important crops including

63 sorghum, soybean, maize, alfalfa and jute (Islam et al. 2012). This soilborne, necrotrophic fungus  
64 occurs across a wide geographic region including tropical and temperate environments (Tarr 1962;  
65 Tesso et al. 2012). Charcoal rot in sorghum is characterized by degradation of pith tissue at or near  
66 the base of the stalk causing the death of stalk pith cells (Edmunds 1964). In this disease, root and  
67 stalk cortical and vascular tissues become damaged, which reduces water translocation and nutrient  
68 absorption (Hundekar and Anahosur 2012).

69

70 Sorghum is a staple cereal crop for many people in the marginal, semi-arid environments of Africa  
71 and South Asia. The unique capability of sorghum to grow in low and variable rainfall regions  
72 reveals its suitability to enhance agricultural productivity in water-limited environments (Rosenow  
73 et al. 1983). Around the world, sorghum is used as a source of food, feed, sugar, and fiber. With  
74 the recent interest in bioenergy feedstocks, sorghum has been recognized as a promising alternative  
75 for sustainable biofuel production (Kimber et al. 2013). Recent studies have revealed the negative  
76 impacts of charcoal rot disease on grain sorghum physicochemical properties (Bandara et al.  
77 2017a), yield components (Bandara et al. 2017b), and the staygreen trait (Bandara et al. 2016), as  
78 well as the biofuel traits of sweet sorghum (Bandara et al. 2018a; Bandara et al. 2017c). As  
79 charcoal rot is a high priority fungal disease in sorghum [*Sorghum bicolor* (L.) Moench], that  
80 causes crop losses where ever sorghum is grown (Tesso et al. 2012), more research is needed to  
81 identify charcoal rot resistance/susceptibility mechanisms. A recent study showed that *M.*  
82 *phaseolina* promotes charcoal rot susceptibility in grain sorghum via induced host cell-wall-  
83 degrading enzymes such as cellulase, pectin methylesterase, and polygalacturonase (Bandara et al.  
84 2018b).

85

86

87 Although some necrotrophic fungi use their own ROS and reactive nitrogen species (RNS) as  
88 virulence factors during infection and colonization (Shetty et al. 2008; van Kan 2006; Choquer et  
89 al. 2007; Sarkar et al. 2014), necrotroph infection-associated up-regulation of host-derived ROS  
90 and RNS is poorly described. To investigate the differentially expressed genes associated with  
91 host-derived oxidative stress, the global transcriptome profiles of charcoal rot resistant (SC599)  
92 and susceptible (Tx7000) sorghum lines were characterized in response to *M. phaseolina*  
93 inoculation using RNA-Seq. Moreover, follow up functional and biochemical studies in relation  
94 to oxidative stress, nitric oxide biosynthetic capacity, the level of lipid peroxidation, and the  
95 antioxidant system of charcoal resistant (SC599, SC35) and susceptible (Tx7000, BTx3042)  
96 sorghum genotypes after inoculation are reported.

97

98

## 99 **RESULTS**

100

### 101 **Differential gene expression analysis**

102

103 The DESeq2 analysis conducted to identify genes with significant genotype  $\times$  treatment interaction  
104 (see 'Materials and Methods') revealed 2317, 7133, and 432 differentially expressed genes (DEG)  
105 at 2, 7, and 30 DPI, respectively. However, only 588, 1718, and 100 of them had assigned  
106 metabolic pathways (SorghumCyc database). The 588 and 1718 DEG were constituents of 14 and  
107 106 significantly enriched metabolic pathways while no significantly enriched pathway was  
108 observed at 30 DPI. Pathway enrichment analysis revealed the greatest expression profile

109 differences between resistant and susceptible genotypes at 7 DPI in response to pathogen infection  
110 as the highest number of enriched pathways occurred at that time. Therefore, for interpretation  
111 purposes, this paper focuses on the transcriptional data at 7 DPI. At 7 DPI, 96 oxidative stress and  
112 antioxidant system-related genes were found to be differentially expressed between charcoal rot  
113 resistant and susceptible genotypes in response to *M. phaseolina* inoculation (Figure 1;  
114 Supplementary Table 1) and are described below.

115

### 116 **Differentially expressed genes involved in host ROS biosynthesis**

117

118 In the endoplasmic reticulum, NAD(P)H-dependent electron transport involving cytochrome P450  
119 (CP450) produces superoxide anions ( $O_2^{\cdot-}$ ) (Mittler 2002). Moreover, the up-regulation of CP450  
120 results in increased conversion of endogenous compounds into reactive metabolites and is a source  
121 of oxidative stress (Nebert et al. 2000). Therefore, increased CP450 expression is a direct  
122 indication of the enhanced oxidative stress. In the current study, a number of cytochrome P480  
123 genes involved in acetone degradation (to methylglyoxal), betanidin degradation, brassinosteroid  
124 biosynthesis II, free phenylpropanoid acid biosynthesis, gibberellic acid biosynthesis, jasmonic  
125 acid biosynthesis, lactucaxanthin biosynthesis, nicotine degradation II, nicotine degradation III,  
126 phaseic acid biosynthesis, and phenylpropanoid biosynthesis were differentially expressed  
127 (Supplementary Table 1). Moreover, 38 differentially expressed CP450 genes did not have  
128 assigned metabolic pathways (Supplementary Table 1). Out of these 38, fourteen were  
129 significantly down-regulated in the susceptible genotype while 22 were significantly up-regulated  
130 (Figure 1), which contributed to a +42.1 log<sub>2</sub>-fold net up-regulation of CP450 genes in the  
131 susceptible genotype (Supplementary Table 1).

132

133 NADPH oxidases catalyze the synthesis of  $O_2^{\cdot-}$  in the apoplast (Sagi and Fluhr 2006). A gene that  
134 encodes an NADPH oxidase (*Sb0621s002010*) was significantly down-regulated (log<sub>2</sub>-fold = –  
135 3.2) in Tx7000 after *M. phaseolina* inoculation (Supplementary Table 1) while the gene in SC599  
136 was not significantly differentially expressed.

137

138 Copper amine oxidases and flavin-containing amine oxidases contribute to defense responses  
139 occurring in the apoplast through  $H_2O_2$  production following pathogen invasion (Cona et al. 2006,  
140 Wimalasekera et al. 2011). In the current study, four genes that encode for flavin-containing amine  
141 oxidases were differentially expressed (Supplementary Table 1), and two of them were  
142 significantly up-regulated in pathogen-inoculated Tx7000 (*Sb06g032450*, *Sb06g032460*; log<sub>2</sub>-fold  
143 = +0.92, +4.10, respectively), while the other two were significantly down-regulated  
144 (*Sb01g044230*, *Sb07g005780*; log<sub>2</sub>-fold = –4.96, –2.04, respectively). Another gene that encodes  
145 for an amine oxidase-related protein (*Sb01g006160*) was significantly down-regulated (log<sub>2</sub>-fold  
146 = –1.39) in Tx7000. Two of the three genes that encoded for a copper methylamine oxidase  
147 precursor (*Sb04g028410*, *Sb02g036990*) were significantly down-regulated in pathogen-  
148 inoculated Tx7000 (log<sub>2</sub>-fold = –3.71, –2.84, respectively) while the other (*Sb06g020020*) was  
149 significantly up-regulated (log<sub>2</sub>-fold = +3.33).

150

151 NADH dehydrogenase is a major source of ROS production in mitochondria (Moller 2001; Arora  
152 et al. 2002). Oxygen is reduced into  $O_2^{\cdot-}$  in the flavoprotein region of NADH dehydrogenase  
153 segment of the respiratory chain complex I (Arora et al. 2002). In the current study, two genes that  
154 encodes for the NADH dehydrogenase 1 alpha sub-complex, assembly factor 1 (*Sb03g033415*,

155 log<sub>2</sub>-fold = +2.14) and a NADH dehydrogenase iron-sulfur protein 4 (*Sb02g037780*, log<sub>2</sub>-fold =  
156 +0.97) were significantly up-regulated in pathogen-inoculated Tx7000 (Supplementary Table 1).

157

### 158 **Differentially expressed genes involved in host NO biosynthesis**

159

160 NO plays a key role in plant immune responses such as the hypersensitive response (HR) during  
161 incompatible plant-pathogen interactions (Delledonne et al. 1998; Durner et al. 1998; Yoshioka et  
162 al. 2011). The nitrate reduction I and citrulline-nitric oxide cycles are the primary NO biosynthetic  
163 pathways in plants (Planchet and Kaiser 2006). In the current study, six genes (*Sb01g039180*,  
164 *Sb04g000530*, *Sb05g000240*, *Sb07g024150*, *Sb09g002030*, and *Sb10g002510*) involved in the  
165 citrulline-nitric oxide cycle that encode for six isozymes of nitric oxide synthase (EC 1.14.13.39)  
166 were significantly down-regulated in Tx7000 after *M. phaseolina* inoculation (Figure 1;  
167 Supplementary Table 1). Compared to mock-inoculated control, this was a -12.1 net log<sub>2</sub>-fold  
168 down-regulation. Interestingly, five genes (*Sb03g039960*, *Sb04g025630*, *Sb04g027860*,  
169 *Sb05g000680*, and *Sb08g011530*) involved in the nitrate reduction I pathway were significantly  
170 up-regulated in pathogen-inoculated Tx7000 and encoded for isozymes of nitrite reductase (NO-  
171 forming) (EC 1.7.2.1), marking a +26.8 net log<sub>2</sub>-fold up-regulation compared to the control  
172 treatment. Moreover, three genes (*Sb04g007060*, *Sb07g022750*, and *Sb07g026290*) involved in  
173 the nitrate reduction II (assimilatory) pathway that encode for NADH-cytochrome b5 reductase  
174 (EC 1.7.1.1) were significantly down-regulated (net log<sub>2</sub>-fold = -7.61) in pathogen-inoculated  
175 Tx7000.

176

### 177 **Differentially expressed genes involved in the antioxidant system**



178

179 Thirty genes with peroxidase activity (Figure 1; Supplementary Table 1) were differentially  
180 expressed between SC599 and Tx7000 after *M. phaseolina* inoculation. Eleven of these genes were  
181 significantly down-regulated in Tx7000 while 14 were significantly up-regulated, resulting in a  
182 +13.3 net log 2-fold up-regulation. A gene that encodes for catalase (*Sb01g048280*) was  
183 significantly down-regulated (log 2-fold = -3.23) in Tx7000 while a superoxide dismutase gene  
184 (*Sb07g023950*) was differentially expressed between genotypes after pathogen infection.

185

### 186 **Analysis of variance (ANOVA) for functional assays**

187

188 The two-way interaction between genotype and inoculation treatment was significant for  
189 ROS/RNS, peroxidase, catalase, and TBARS assays at all three post-inoculation stages (4, 7, and  
190 10 DPI) (Table 1). SOD activity was an exception where genotype had a significant main effect at  
191 4 DPI while both genotype and inoculation treatment had significant main effects at 7 and 10 DPI.

192

### 193 ***M. phaseolina* inoculation induces ROS and RNS accumulation in charcoal rot susceptible** 194 **genotypes**

195

196 To investigate the potential differences of oxidative stress imposed by *M. phaseolina* on charcoal  
197 rot resistant and susceptible sorghum genotypes, the total free radical population (representative  
198 of both ROS and RNS) in mock- (control) and pathogen-inoculated samples were measured at  
199 three post-inoculation stages. Compared to control, *M. phaseolina* significantly increased the ROS  
200 and RNS content of both susceptible genotypes (BTx3042 and Tx7000) at all three post-

201 inoculation stages (4, 7, and 10 DPI) (Figure 2). The percent increase for BTx3042 compared to  
202 control was +70.5, +52.5, and +123.8 at 4, 7, and 10 DPI, respectively, while the same for Tx7000  
203 was +185.1, +47.3, and +81.9. *M. phaseolina* inoculation did not significantly affect the ROS and  
204 RNS content of the two resistant genotypes, SC599 and SC35. Although not statistically  
205 significant, ROS and RNS content of *M. phaseolina*-inoculated SC599 was lower than the control  
206 at 10 DPI. The same phenomenon was observed for SC35 at 4 and 7 DPI.

207

### 208 ***M. phaseolina* inoculation induces NO accumulation in charcoal rot susceptible genotypes**

209

210 The bright green fluorescence observed in the infected stalk cross-sections of Tx7000 and  
211 BTx3042 at 7 DPI indicated NO-specific fluorescence when stained with DAF-FM DA (Figure  
212 3). This revealed the ability of *M. phaseolina* to induce NO biosynthesis and accumulation in  
213 charcoal rot susceptible sorghum genotypes. NO-specific fluorescence was absent in control tissue  
214 sections (Figure 3), which indicated that induction of NO occurred only after inoculation with the  
215 pathogen. Neither mock- nor pathogen-inoculation produced NO-specific fluorescence in the  
216 resistant genotypes, SC599 and SC35 (Figure 3). Therefore, the resistant genotypes tested in this  
217 study did not undergo NO burst-mediated oxidative stress after *M. phaseolina* infection.

218

### 219 **Impact of *M. phaseolina* inoculation on sorghum antioxidant enzymes**

220

221 Peroxidases (PX) and catalases (CAT) are important antioxidant enzymes involved in  
222 decomposing hydrogen peroxide into water (Hammond-Kosack and Jones 1996). *M. phaseolina*  
223 inoculation significantly increased PX activity (mU/mL) in both susceptible genotypes at all post-

224 inoculation stages (Figure 4). The percent activity increase for BTx3042 was +36.9, +41.6, and  
225 +37.6% at 4, 7, and 10 DPI, respectively, while the same for Tx7000 were +89.0, +37.0, and  
226 +25.9%. *M. phaseolina* inoculation did not significantly affect the PX activity of the two resistant  
227 genotypes, SC599 and SC35. Although not significant, SC599 and SC35 had reduced PX activity  
228 in comparison to their respective controls at three post-inoculation stages.

229

230 Compared to their respective controls, the CAT activity (U/mL) of the two resistant genotypes was  
231 significantly increased after *M. phaseolina* inoculation at all three post-inoculation stages (Figure  
232 5). The percent activity increase for SC599 was 50.8, 33.8, and 29.5% at 4, 7, and 10 DPI,  
233 respectively, while the same for SC35 was +104.4, +55.5, and +97.8. SC599 exhibited a general  
234 trend of declining activity over time with both control and pathogen inoculations. SC35 followed  
235 increased and decreased activity over time for both treatments. Interestingly, *M. phaseolina*  
236 inoculation significantly decreased the CAT activity of BTx3042 (-38.1%) and Tx7000 (-39.3%)  
237 at 7 DPI, although no significant impact was observed at 4 and 10 DPI.

238

239 Superoxide dismutase (SOD) is an antioxidant enzyme responsible for regulating superoxide  
240 anions. It converts superoxide to hydrogen peroxide, which can be subsequently detoxified into  
241 water through peroxidase and catalase activity (Hammond-Kosack and Jones 1996). In this study,  
242 SOD activity was not sorghum genotype-specific. Although *M. phaseolina* inoculation did not  
243 significantly affect SOD activity at 4 DPI, it significantly decreased activity at 7 and 10 DPI across  
244 the four genotypes (Figure 6). SOD activity was reduced by -14.7 and -15.6% at 7 and 10 DPI,  
245 respectively. SOD activity of the four genotypes was not significantly different from each other at  
246 4 DPI across inoculation treatments (Figure 6). However, SOD activity in SC35 decreased over

247 time and became significantly lower than BTx3042 and Tx7000 at 7 DPI. At 10 DPI, SC35  
248 exhibited significantly less activity than the other genotypes.

249

### 250 ***M. phaseolina* inoculation enhances lipid peroxidation in charcoal rot susceptible genotypes**

251

252 The degree of lipid peroxidation, as indicated by malondialdehyde (MDA) content is a direct  
253 indicator of the degree of oxidative stress experienced by plants (Sharma et al. 2012). *M.*  
254 *phaseolina* inoculation significantly increased MDA content ( $\mu\text{M}$ ) in both charcoal rot susceptible  
255 genotypes at all three post-inoculation stages (Figure 7). Compared to control, the increase in  
256 MDA after inoculation in BTx3042 was +124.0, +54.4, and +80.6% at 4, 7, and 10 DPI,  
257 respectively, while the same for Tx7000 was +262.4, +70.0, and +75.0%. *M. phaseolina*  
258 inoculation did not significantly affect MDA content in the two resistant genotypes, SC599 and  
259 SC35. In general, SC35 showed higher MDA content at 4 and 7 DPI for both control and pathogen  
260 inoculations compared to the other genotypes (Figure 7). However, there was a dramatic MDA  
261 drop from 7 to 10 DPI with both control and pathogen inoculations for SC35.

262

263

## 264 **DISCUSSION**

265

### 266 ***M. phaseolina* infection induces host oxidative stress and contribute to induced charcoal rot** 267 **susceptibility**

268

269 The synthesis and accumulation of ROS in plants as a defense response to pathogen attack have  
270 been well described (Dangl and Jones 2001; Torres et al. 2002). Apoplastic synthesis of superoxide  
271 ( $O_2^{\bullet-}$ ) and its dismutation product hydrogen peroxide ( $H_2O_2$ ) has been reported in response to a  
272 variety of pathogens (Doke 1983; Auh and Murphy 1995; Grant et al. 2000). Although ROS  
273 accumulation typically correlates with active disease resistance reactions against biotrophic or  
274 hemibiotrophic pathogens (Vanacker et al. 2000; Allan and Fluhr 1997), certain necrotrophs  
275 induce ROS synthesis in the infected tissue to promote cell death that facilitates subsequent  
276 infection (Govrin and Levine 2000; Foley et al. 2016). In fact, ROS-mediated defense responses,  
277 effective against biotrophic pathogens, increase the susceptibility to necrotrophic pathogens  
278 (Kliebenstein and Rowe 2008). The current study provided transcriptional and functional evidence  
279 for the ability of necrotrophic fungus *M. phaseolina* to induce ROS and RNS in charcoal rot  
280 susceptible sorghum genotypes (Tx7000, BTx3042).

281

282 In the endoplasmic reticulum, the CP450 involved in the NAD(P)H-dependent electron transport  
283 chain contributes to  $O_2^{\bullet-}$  production (Mittler 2002). In this study, a net up-regulation of CP450s  
284 was observed in the susceptible genotype Tx7000, which potentiates NAD(P)H-dependent  $O_2^{\bullet-}$   
285 production in the endoplasmic reticulum. Therefore, the endoplasmic reticulum appears to be a  
286 ROS-generating powerhouse, contributing to enhanced oxidative stress in Tx7000 after *M.*  
287 *phaseolina* inoculation. In the apoplast, NADPH oxidases catalyze the synthesis of  $O_2^{\bullet-}$  (Sagi and  
288 Fluhr 2006). NADPH oxidases are also involved in ROS production in response to pathogen  
289 infections (Sagi and Fluhr 2001; Torres et al. 2002). Fungal NADPH oxidases have been shown  
290 to be required for the pathogenesis of certain necrotrophic fungi such as *Sclerotinia sclerotiorum*  
291 (Kim et al. 2011), *Botrytis cinerea* (Segmueller et al. 2008), and *Alternaria alternata* (Yang and

292 Chung 2012). In the current study, the observed down-regulation of a host NADPH oxidase gene  
293 (*Sb0621s002010*) suggested that apoplastic  $O_2^{\cdot-}$  is not a significant source of *M. phaseolina*-  
294 induced oxidative stress in Tx7000.

295

296 Amine oxidases are involved in apoplastic  $H_2O_2$  production (Cona et al. 2006, Wimalasekera et  
297 al. 2011). Genes encoding amine oxidases showed a net down-regulation in Tx7000. Thus, amine  
298 oxidase-mediated apoplastic  $H_2O_2$  production would remain minimal in the susceptible genotype  
299 in response to *M. phaseolina* inoculation.

300

301 NADH dehydrogenases are a source of ROS production in mitochondria (Moller 2001; Arora et  
302 al. 2002). The significant up-regulation of two NADH dehydrogenase genes (*Sb02g037780*,  
303 *Sb03g033415*) suggested the potential contribution of mitochondria as a source of enhanced ROS  
304 production in Tx7000 in response to pathogen inoculation. Consistent with the gene expression  
305 data, the in vitro DCF-based ROS and RNS functional assay revealed *M. phaseolina*'s ability to  
306 significantly increase the stalk free radicle content of both susceptible genotypes (BTx3042 and  
307 Tx7000) at all three post inoculation stages (4, 7, and 10 DPI). Therefore, *M. phaseolina*'s ability  
308 to trigger an oxidative stress response in charcoal rot susceptible sorghum genotypes was evident.

309

310 Along with ROS, NO plays a vital role in the hypersensitive response to avirulent biotrophic  
311 pathogens (Delledonne et al. 1998; Durner et al. 1998; Yoshioka et al. 2011). The role of NO in  
312 host defense against necrotrophs is contradictory. For instance, NO is claimed to confer resistance  
313 against certain necrotrophic fungal pathogens (Asai et al. 2010; Perchepped et al. 2010). On the  
314 contrary, an accumulation of NO in host tissue correlated with enhanced disease susceptibility was

315 observed in the compatible jute-*M. phaseolina* (Sarkar et al. 2014) and lily-*Botrytis*  
316 *elliptica* interactions (van Baarlen et al. 2004). Agreeing with the latter phenomenon, we observed  
317 an NO burst in susceptible sorghum stalk tissues (Tx7000, BTx3042) after *M. phaseolina*  
318 inoculation. NO-specific fluorescence was found to be stronger in the vascular bundle regions. As  
319 no mycelial fragments or microsclerotia were observed in the cross-sections, the observed NO was  
320 exclusively from the host. If so, this suggests the systemic circulation of NO through the vascular  
321 tissues. Moreover, fluorescence was observed in parenchyma cells, which indicated the cell-to-  
322 cell movement of NO. The movement of NO via apoplastic and symplastic pathways has been  
323 described (Graziano and Lamattina, 2005).

324

325 The RNA sequencing experiment provided some clues on the host metabolic pathways that  
326 contributed to the surge in NO. The nitrate reduction I and citrulline-nitric oxide cycles are the  
327 primary NO biosynthetic pathways in plants (Planchet and Kaiser 2006). In the citrulline-nitric  
328 oxide cycle, NO is synthesized from arginine by nitric oxide synthase, generating L-citrulline as a  
329 by-product (Planchet and Kaiser 2006). In the current study, the down-regulated nitric oxide  
330 synthase genes in Tx7000 suggested that the citrulline-nitric oxide cycle remains inactive during  
331 *M. phaseolina* infection and is not a significant source pathway for NO synthesis. Interestingly,  
332 the genes encoding nitrite reductase (EC 1.7.2.1), which are involved in the nitrate reduction I  
333 pathway were highly up-regulated in Tx7000 after pathogen inoculation. Nitrite reductase converts  
334 nitrite into NO. Therefore, the nitrate reduction I pathway appeared to be the major source of host-  
335 derived NO in response to *M. phaseolina* infection. This argument is further bolstered by the  
336 observed down-regulation of the nitrate reduction II (assimilatory) pathway in Tx7000 after  
337 pathogen inoculation. In this pathway, the Tx7000 genes encoding NADH-cytochrome b5

338 reductase (EC 1.7.1.1), which catalyzes the conversion of nitrate to nitrite, were down-regulated,  
339 limiting nitrite to ammonia and ammonia to L-glutamine conversions in the chloroplast. Therefore,  
340 the down-regulated NADH-cytochrome b5 reductase genes increase the availability of nitrate  
341 pools for the nitrate reduction I pathway where nitrate is reduced to NO. Therefore, over-  
342 accumulation of NO in the stalk tissues as induced by *M. phaseolina* appears to constitute a key  
343 element in determining the success of this necrotrophic pathogen.

344

345 In the current study, evidence for NO and O<sub>2</sub><sup>•-</sup> accumulation in charcoal rot susceptible sorghum  
346 genotypes after *M. phaseolina* inoculation has been shown. NO can react with O<sub>2</sub><sup>•-</sup> to form the  
347 RNS species, peroxynitrite (ONOO<sup>-</sup>) (Koppenol et al. 1992). Peroxynitrite triggers a myriad of  
348 cytotoxic effects including lipid peroxidation, protein unfolding and aggregation, and DNA strand  
349 breakage (Vandelle and Delledonne 2011; Murphy 1999). When produced abundantly, ONOO<sup>-</sup>  
350 contributes to rapid necrosis, whereas lower quantities induce apoptosis (Bonfoco et al. 1995).  
351 Although not tested, the significantly increased free radical content observed in charcoal rot-  
352 susceptible genotypes could be indicative of an increase in ONOO<sup>-</sup> in pathogen-inoculated Tx7000  
353 and BTx3042. Therefore, plant-derived ONOO<sup>-</sup> may play a role as an endogenous virulence factor  
354 for *M. phaseolina*.

355

356 ROS- and RNS-associated lipid peroxidation during pathogen infection has been widely described  
357 (Jalloul et al. 2002; Göbel et al. 2003; Zoeller et al. 2012). The peroxidation of unsaturated fatty  
358 acids in phospholipids produces malondialdehyde (MDA), which in turn damages cell and  
359 organelles membranes (Halliwell and Gutteridge 1989). The oxidative stress experienced by



360 charcoal rot susceptible sorghum genotypes after *M. phaseolina* inoculation was further confirmed  
361 by enhanced lipid peroxidation observed in those genotypes.

362

### 363 **Impact of *M. phaseolina* infection on the sorghum antioxidant system**

364

365 Activation of plant antioxidant systems in response to various pathogens and its contribution to  
366 enhanced disease resistance has been well documented (Malencic et al. 2010; Kiproviski et al.  
367 2012; Debona et al. 2012; Fortunato et al. 2015). On the contrary, the fungal necrotroph *Botrytis*  
368 *cinerea* triggers a progressive inhibition of SOD, CAT, and PX parallel to disease symptom  
369 development in tomato and leads to a collapse of the peroxisomal antioxidant system at advanced  
370 stages of infection (Kuzniak and Sklodowska 2005). However, infection of the necrotrophic  
371 fungus, *Corynespora cassiicola* enhanced peroxidase activity in soybean leaves (Fortunato et al.  
372 2015). Gene expression (7 DPI) and the peroxidase functional experiment (4, 7, and 10 DPI)  
373 conducted in the current study revealed a significant up-regulation of peroxidase activity in  
374 charcoal rot susceptible genotypes after *M. phaseolina* inoculation. This suggested the enhanced  
375 accumulation of H<sub>2</sub>O<sub>2</sub> after infection. Peroxidases are antioxidant enzymes that convert toxic H<sub>2</sub>O<sub>2</sub>  
376 into H<sub>2</sub>O and O<sub>2</sub> (Hammond and Jones 1996). It appeared that increased peroxidase activity in  
377 Tx7000 and BTx3042 helps to lower their H<sub>2</sub>O<sub>2</sub> concentrations and thus reduce oxidative stress  
378 after *M. phaseolina* infection.

379

380 Catalase is a key H<sub>2</sub>O<sub>2</sub>-scavenging enzyme in plants (Willekens et al. 1997) and has one of the  
381 highest turnover rates for all enzymes where one molecule of catalase can convert six million  
382 molecules of H<sub>2</sub>O<sub>2</sub> to H<sub>2</sub>O and O<sub>2</sub> min<sup>-1</sup> (Gill and Tuteja 2010). In tobacco, reduced catalase

383 activity results in hyper-responsiveness to biotrophic pathogens (Mittler et al. 1999), while catalase  
384 overexpression leads to enhanced disease sensitivity (Polidoros et al. 2001). Previous reports  
385 revealed that catalase activity is suppressed during the interaction of plants with invading  
386 pathogens and in turn, contributes to the escalation of pathogen-induced programmed cell death  
387 (PCD) (Draper 1997; Chamnongpol et al. 1996; Chen et al. 1993; Takahashi et al. 1997).  
388 Suppressed catalase activity-associated ROS production augmentation, is therefore crucial for  
389 conferring resistance against biotrophic and hemibiotrophic plant pathogens while conducive to  
390 necrotrophic infection. *M. phaseolina* inoculation leads to reduced catalase activity in two charcoal  
391 rot-susceptible sorghum genotypes at 7 DPI. One potential reason for this observation is the  
392 reaction between NO and catalase. NO and ONOO<sup>-</sup> can bind with heme-containing antioxidant  
393 enzymes such as catalase and inhibit its activity (Kerwin et al. 1995; Pacher et al. 2007). NO is  
394 produced in pathogen-inoculated Tx7000 and BTx3042 at 7 DPI and could, in turn, inhibit catalase  
395 activity. Enhanced catalase activity in the two resistant genotypes after *M. phaseolina* inoculation  
396 at all post-inoculation stages could contribute to active scavenging of H<sub>2</sub>O<sub>2</sub> and ease oxidative  
397 stress. This, in turn, could subvert *M. phaseolina* colonization in SC599 and SC35, which  
398 contributes to resistance.

399  
400 A significant reduction in superoxide dismutase activity was observed at 7 and 10 DPI by *M.*  
401 *phaseolina* (compared to control) across the four genotypes tested in this study. Transcriptional  
402 data suggested *M. phaseolina*'s ability to increase the O<sub>2</sub><sup>-</sup> biosynthesis potential of Tx7000. This,  
403 arguably, increases the Tx7000's necessity for more SOD as it is the only plant enzyme capable  
404 of scavenging O<sub>2</sub><sup>-</sup>. However, by using confocal microscopy and the ROS/RNS functional assay,  
405 evidence exists for potentially enhanced ONOO<sup>-</sup> synthesis in susceptible genotypes under

406 pathogen inoculation. Formation of ONOO<sup>-</sup> leads to decreased endogenous O<sub>2</sub><sup>·-</sup> levels. Therefore,  
407 it may be possible that O<sub>2</sub><sup>·-</sup> decreases to a level where additional SOD is not required by the  
408 susceptible genotypes tested. This manifested as reduced SOD activity after *M. phaseolina*  
409 inoculation.

410

411 In this study, genome-wide transcriptome profiles of *M. phaseolina*-challenged charcoal rot  
412 resistant (SC599) and susceptible (Tx7000) sorghum genotypes were examined to identify the  
413 differentially expressed genes that related to host oxidative stress and antioxidant system. The  
414 observed up-regulation of cytochrome P450s, which potentiate NAD(P)H-dependent O<sub>2</sub><sup>·-</sup>  
415 production in the endoplasmic reticulum, and NADH dehydrogenase genes, respectively,  
416 suggested the importance of endoplasmic reticulum and mitochondria as ROS generating  
417 powerhouses that contributed to enhanced oxidative stress in Tx7000 after *M. phaseolina*  
418 inoculation. Enhanced pathogen inoculation-mediated oxidative stress enhancement in Tx7000  
419 and BTx3042 was confirmed by increased ROS/RNS and malondialdehyde content. Prominent  
420 nitric oxide (NO) accumulation observed in Tx7000 and BTx3042 after *M. phaseolina* inoculation  
421 was associated with the up-regulated host nitrate reduction I metabolic pathway. Transcriptional  
422 and functional data demonstrated enhanced peroxidase and decreased catalase and superoxide  
423 dismutase activities in inoculated susceptible genotypes. Overall, this study demonstrated the  
424 ability of *M. phaseolina* to trigger strong host-derived oxidative stress in charcoal rot susceptible  
425 sorghum genotypes. Host cell death associated with enhanced oxidative stress in turn contribute  
426 to the rapid colonization and spread of this necrotrophic fungus leading to induced charcoal rot  
427 susceptibility. Use of differentially expressed genes and *in planta* NO synthesis as potential

428 molecular- and biochemical-markers in sorghum germplasm screening for charcoal rot resistance  
429 and susceptibility is of interest for future research.

430

431

## 432 **MATERIALS AND METHODS**

433

### 434 **Plant materials and experimental design**

435

436 Two greenhouse experiments were conducted to obtain materials for investigation. For the RNA-  
437 Seq experiment, one charcoal rot resistant (SC599) and one susceptible (Tx7000) sorghum  
438 genotype were used in 2013. In 2015, follow-up functional studies were conducted using charcoal  
439 rot resistant (SC599, SC35) and susceptible (Tx7000, BTx3042) lines. For both greenhouse  
440 experiments, seeds were treated with the fungicide Captan (N-trichloromethyl thio-4-cyclohexane-  
441 1,2 dicarboxamide) and planted in 19 L Poly Tainer pots filled with Metro-Mix 360 growing  
442 medium (Sun Gro Bellevue, WA, U.S.A). Although three seeds were planted pot<sup>-1</sup> at the beginning  
443 of each experiment, each pot was thinned to one seedling at three weeks after emergence.  
444 Maintenance of seedlings and plants was performed according to the protocols described by  
445 Bandara et al. (2015). Plants were maintained at 25 to 32°C under a 16-h light/8-h dark  
446 photoperiod. Both greenhouse experiments were established as a completely randomized design  
447 (CRD).

448

### 449 **Inoculum preparation and inoculation**

450

451 A highly virulent *M. phaseolina* isolate obtained from the Row Crops Pathology Lab at the  
452 Department of Plant Pathology, Kansas State University was used for inoculation. Inoculum  
453 preparation was based upon the protocol published by Bandara et al. (2015). Briefly, *M. phaseolina*  
454 was grown for 5 d on potato dextrose agar (PDA) at 30°C. For the mass production of mycelia, *M.*  
455 *phaseolina* cultures were initiated in potato dextrose broth (PDB) shake cultures. The broth  
456 containing the mycelial mass was blended and filtered through four layers of sterile cheesecloth to  
457 obtain small mycelial fragments. Filtrates with mycelial fragments were centrifuged at 3000 g for  
458 five minutes. The mycelial pellets were resuspended in 50 mL of 10 mM (pH 7.2) sterile  
459 phosphate-buffered saline (PBS; pH 7.2). The original mycelial fragment concentration was  
460 determined using a hemocytometer and the final concentration was adjusted to  $2 \times 10^6$  fragments  
461  $\text{mL}^{-1}$  by adding an appropriate volume of PBS. Inoculum preparation occurred under aseptic  
462 conditions. Inoculations were performed at 14 d after anthesis. The plant basal internode was  
463 injected with 0.1 mL of inoculum ( $1 \times 10^6$  viable mycelial fragments  $\text{mL}^{-1}$ ) using a sterile surgical  
464 syringe. Mock-inoculations (control treatment) were performed with PBS (pH 7.2).

465

#### 466 **Collection of stalk tissues from inoculated plants**

467

468 Stalk tissues of inoculated and mock-inoculated control plants were collected from three biological  
469 replicates at 2, 7, and 30 days post-inoculation (DPI) (three biological replicates  $\text{DPI}^{-1}$  treatment<sup>-1</sup>  
470 sorghum line<sup>-1</sup> = 36 plants total) for the RNA sequencing experiment. From each biological  
471 replicate, an approximately 8 to 10 cm long stalk piece encompassing the inoculation point was  
472 collected and immediately frozen in liquid nitrogen to prevent mRNA degradation and then stored  
473 at -80°C until RNA was extracted. At 4, 7, and 10 DPI, 15 cm long stalk pieces encompassing the

474 inoculation point were cut from five biologically replicated plants, immediately suspended in  
475 liquid nitrogen, and subsequently stored at -80°C until used in functional assays.

476

#### 477 **RNA extraction and quantification**

478

479 Stalk tissues (approximately 1 g) from 1 cm above the symptomatic area were used for RNA  
480 extraction. Total RNA was extracted using Triazole reagent (Thermo Scientific, USA). RNA was  
481 treated with Amplification Grade DNase I (Invitrogen Corporation, USA). The quantity and  
482 quality of RNA extracts were assessed using a Nanodrop 2000 (Thermo Scientific, USA). Samples  
483 were diluted up to 100 to 200 ng/μl concentration using RNase-free water. Before cDNA library  
484 preparation, the integrity and quantity of diluted RNA samples were reassessed using an Agilent  
485 2100 Bioanalyzer (Agilent Technologies Genomics, USA) to ensure the quality of cDNA libraries.

486

#### 487 **cDNA library preparation and Illumina sequencing**

488

489 Using the Illumina TruSeq<sup>TM</sup> RNA sample preparation kit and the manufacturer's protocol  
490 (Illumina Inc., USA), thirty-six cDNA libraries were constructed. First, using "oligodT" attached  
491 magnetic beads, each RNA sample was subjected to two rounds of enrichment for poly-A mRNAs.  
492 Purified mRNA was then chemically fragmented and then converted to single-stranded cDNA.  
493 cDNA of each library was differentially barcoded using unique adapter index sequences.  
494 Sequencing was conducted on a HiSeq 2000 platform (Illumina Inc., USA) using 100 bp single-  
495 end sequencing runs at the Kansas University Medical Center Genome Sequencing Facility

496 (Lawrence, Kansas). These libraries were also used for differential analysis of host-induced cell  
497 wall degrading enzyme genes in the *M. phaseolina*-sorghum pathosystem (Bandara et al., 2018b).

498

#### 499 **Differential gene expression and metabolic pathway enrichment analyses**

500

501 First, trimming of adapters from sequence reads and subsequent quality filtering were carried out  
502 using “Cutadapt” (Martin, 2011). GSNAP (genomic short-read nucleotide alignment program; Wu  
503 and Watanabe, 2005) was used to align reads to the *Sorghum bicolor* reference genome  
504 (Sbicolor\_v1.4; Paterson et al., 2009). An R package, ‘DESeq2’, was used to perform the  
505 differential gene expression analysis, where the analysis was based on the  $H_0$  of no two-way  
506 interaction between sorghum line and inoculation treatment for each gene at a given DPI. A q-  
507 value (Benjamini and Hochberg, 1995) was determined for each gene and those genes with q-  
508 values  $< 0.05$  were considered significantly differentially expressed (i.e., a significant two-way  
509 interaction) to account for multiple comparisons. Therefore, the false discovery rate (FDR) was  
510 maintained at 5%. The differentially expressed genes were annotated using the “Phytozome”  
511 database (Goodstein et al., 2012). The metabolic pathways associated with differentially expressed  
512 genes were identified using the SorghumCyc database (<http://pathway.gramene.org/gramene/sorghumcyc.shtml>). Finally, the significantly enriched metabolic pathways  
513 were determined using metabolic pathway enrichment analysis as described by Dugas et al. (2011).

514

#### 515 **Preparation of cell lysates and measuring absorption and fluorescence for functional assays**

516

517

518 Stalk tissues were retrieved from -80°C storage and approximately 1 g of stalk tissue (taken 1 cm  
519 away from the symptomatic region) were sectioned and placed into liquid nitrogen (in a mortar)  
520 using a sterile scalpel. The stalk pieces were ground into a fine powder using a pestle.  
521 Approximately 200 mg of the tissue powder was quickly transferred to 2 mL microcentrifuge tubes  
522 filled with 1 ml of 1× PBS + 0.5% Triton X (for in vitro ROS/RNS assay), 1× PBS with 1× BHT  
523 (for quantification of lipid peroxidation via the thiobarbituric acid reactive substances assay), 1×  
524 PBS with 1mM EDTA (for the catalase and peroxidase assays), and 1× lysis buffer (10 mM Tris,  
525 pH 7.5, 150 mM NaCl, 0.1 mM EDTA; for superoxide dismutase assay). Buffer selections were  
526 based on the instructions provided by assay kit manufacturers (see below). Samples were  
527 centrifuged at 10000 g for 10 min at 4°C. Supernatants were transferred into new microcentrifuge  
528 tubes and stored at -80°C until used in assays. All absorption and fluorescence were performed  
529 using a 96-well plate reader (Synergy H1 Hybrid Reader; BioTek, Winooski, VT, USA) at  
530 specified wavelengths (see below). Path length correction was performed using an option available  
531 by the plate reader during the measurements.

532

### 533 **Quantification of total oxidative stress**

534

535 The OxiSelect In Vitro ROS/RNS Assay Kit (Cell Biolabs, San Diego, CA, USA) was used to  
536 quantify reactive species (ROS) and reactive nitrogen species (RNS) content. The assay employs  
537 a ROS/RNS-specific fluorogenic probe, dichlorodihydrofluorescein DiOxyQ (DCFH-DiOxyQ),  
538 which is first primed with a quench removal reagent and subsequently stabilized in the highly  
539 reactive DCFH form. Various ROS and RNS such as hydrogen peroxide (H<sub>2</sub>O<sub>2</sub>), peroxy radical  
540 (ROO<sup>•</sup>), nitric oxide (NO), and the peroxynitrite anion (ONOO<sup>-</sup>) can react with DCFH and oxidize



541 it into the fluorescent 2',7'-dichlorodihydrofluorescein (DCF) molecule. Fluorescence intensity is  
542 proportional to the ROS and RNS content within the sample. The assay measures the total free  
543 radical population within a sample. In this study, reactive species content was assayed following  
544 the protocol described by the manufacturer. Briefly, 50  $\mu\text{L}$  of the supernatant (see the previous  
545 section) from each sample was transferred to a black 96-well Nunclon Delta Surface microplate  
546 (Thermo Scientific Nunc, Roskilde, Denmark) and incubated with the catalyst (1 $\times$ ) for 5 min at  
547 room temperature. One hundred  $\mu\text{L}$  of freshly prepared DCFH solution was added to each well  
548 and incubated for 45 min. The reaction mix was protected from light using aluminum foil. After  
549 incubation, sample fluorescence was measured at 485 nm excitation and 535 nm emission  
550 wavelengths. A dilution series of DCF standards (in the concentration range of 0 to 10  $\mu\text{M}$ ) was  
551 prepared by diluting the 1mM DCF stock in 1 $\times$  PBS and then used to prepare a DCF standard  
552 curve. Sample reactive species were determined using a DCF standard curve and expressed as mM  
553 DCF 200  $\text{mg}^{-1}$  fresh stalk tissue.

554

#### 555 **Detection of nitric oxide (NO) by confocal microscopy**

556

557 A cell-permeable fluorescent dye, 4-amino-5-methylamino-2',7'-difluorofluorescein diacetate  
558 (DAF-FM DA; Molecular Probes, Eugene, OR, USA) was used to detect NO production in  
559 sorghum genotype stalks in response to inoculation treatment at 7 DPI. DAF-FM DA is non-  
560 fluorescent until it reacts with NO to form DAF-FM (bright green fluorescence). The fluorescence  
561 quantum yield of DAF-FM increases about 160-fold after reacting with nitric oxide (Kojima et al.,  
562 1999). In this study, sorghum stem cross sections (made 1 cm away from the symptomatic area)  
563 were incubated with 10 mM DAF-FM DA prepared in 10 mM Tris-HCl (pH 7.4) for 1 h at 25 C,

564 in the dark (Corpas et al., 2004). After incubation, samples were washed twice with 10 mM Tris-  
565 HCl buffer for 15 min each. Tissue sections were examined using a Carl Zeiss 700 confocal  
566 microscope. Light intensity and exposure times were constant across all observations. DAF-FM  
567 DA fluorescence (excitation 495 nm; emission 515 nm) and chlorophyll *a* and *b* autofluorescence  
568 (excitation 329 and 450 nm; emission 650 and 670 nm) registered as green and red, respectively.  
569 For each sorghum genotype, the fluorescence of the mock-inoculated treatment (control) was used  
570 as the baseline.

571

### 572 **Quantification of peroxidase activity**

573

574 The Amplex Red Hydrogen Peroxide/Peroxidase Assay Kit (Molecular Probes, Eugene, OR,  
575 USA) was used for peroxidase activity determination. In the presence of peroxidase, the Amplex  
576 Red reagent reacts with H<sub>2</sub>O<sub>2</sub> in a 1:1 stoichiometry to produce the red-fluorescent oxidation  
577 product, resorufin. In this study, 50 µL of the sample was diluted in a microcentrifuge tube by  
578 adding 200 µL of 1× reaction buffer. Fifty µL from each diluted sample was transferred to a black  
579 96-well microplate. Then, 50 µL of the Amplex Red reagent/H<sub>2</sub>O<sub>2</sub> working solution (100 µM  
580 Amplex Red reagent containing 2 mM H<sub>2</sub>O<sub>2</sub>) was added. The microplate was covered with  
581 aluminum foil to protect from light and was incubated at room temperature for 30 minutes.  
582 Fluorescence was read at 545 nm excitation and 590 nm emission detection. Blanks included every  
583 component mentioned above in which 50 µL 1× reaction buffer was added in place of peroxidase.  
584 For each point, the value derived from the control was subtracted. A horseradish peroxidase (HRP)  
585 standard curve was prepared by following the protocol described by the assay kit manufacturer.  
586 The peroxidase activity of samples was determined using the HRP standard curve and expressed

587 as milliunits of peroxidase mL<sup>-1</sup> 200 mg<sup>-1</sup> of fresh stalk tissue where 1 U of enzyme forms 1.0 mg  
588 purpurogallin from pyrogallol 20 sec<sup>-1</sup> at pH 6.0 at 20°C.

589

### 590 **Quantification of catalase activity**

591

592 Catalase activity was determined using the OxiSelect Catalase Activity Assay Kit (Cell Biolabs,  
593 San Diego, CA, USA). The kit assay involves catalase induced decomposition of externally  
594 introduced H<sub>2</sub>O<sub>2</sub> into water and oxygen. The rate of this decomposition is proportional to the  
595 catalase concentration in the sample. In the presence of horseradish peroxidase (HRP) catalyst, the  
596 remaining hydrogen peroxide in the reaction mixture facilitates the coupling reaction of the two  
597 chromagens used in the assay, forming a quinoneimine dye. Absorption of this dye is measured at  
598 520 nm. The absorption is proportional to the amount of hydrogen peroxide remaining in the  
599 reaction mixture, which is indicative of the original catalase activity of the sample. In this study,  
600 20 µL of the sample was transferred to a clear 96-well microtiter plate. Fifty µL of a hydrogen  
601 peroxide working solution (12 mM) was added to each well, thoroughly mixed, and incubated for  
602 1 min. The reaction was stopped by adding 50 µL of the catalase quencher into each well and  
603 mixed. Five µL of each reaction well was transferred to a new 96-well microtiter plate. Two-  
604 hundred-fifty µL of chromogenic working solution was added to each well. The plate was  
605 incubated for 1 hour with vigorous mixing on a shaker (140 rotations min<sup>-1</sup>). Absorbance was  
606 measured at 520 nm. A catalase standard curve was prepared by following the protocol described  
607 by the assay kit manufacturer. The catalase activity of the samples was determined using the  
608 standard curve and expressed as units of catalase mL<sup>-1</sup> 200 mg<sup>-1</sup> of fresh stalk tissue where 1 unit

609 (U) is defined as the amount of enzyme that will decompose 1.0  $\mu\text{mole}$  of  $\text{H}_2\text{O}_2 \text{ min}^{-1}$  at pH 7.0  
610 and 25°C.

611

### 612 **Quantification of superoxide dismutase (SOD) activity**

613

614 The OxiSelect Superoxide Dismutase Activity Assay kit (Cell Biolabs, San Diego, CA, USA) was  
615 used to quantify SOD activity. This assay uses a xanthine/xanthine oxidase (XOD) system to  
616 generate superoxide anions. Upon reduction by superoxide anions, the assay chromagen produces  
617 a formazan dye that is soluble in water. SOD activity is computed as the inhibition of chromagen  
618 reduction. Therefore, in the presence of SOD, superoxide anion concentrations are reduced,  
619 resulting in a weak colorimetric signal. In the current study, 20  $\mu\text{L}$  from each sample was  
620 transferred to a 96-well microtiter plate. According to the kit manufacturer's protocol, each well  
621 contained xanthine solution (5  $\mu\text{L}$ , 1 $\times$ ), chromogen solution (5  $\mu\text{L}$ ), SOD assay buffer (10  $\mu\text{L}$ ,  
622 10 $\times$ ), and distilled water (50  $\mu\text{L}$ ). Finally, 10  $\mu\text{L}$  of xanthine oxidase solution (1 $\times$ ) was added to  
623 each well and mixed well. Blank tests included every component mentioned above except 20  $\mu\text{L}$   
624 of 1 $\times$  lysis buffer instead of the SOD sample. After 1 hour of incubation at 37°C, absorbance was  
625 read at 490 nm. SOD activity was computed using the formula below:

626

$$627 \text{ SOD activity (\% inhibition)} = [(\text{OD}_{\text{blank}} - \text{OD}_{\text{sample}}) \div \text{OD}_{\text{blank}}] \times 100$$

628

### 629 **Quantification of lipid peroxidation**

630

631 To estimate lipid peroxidation stalk sample malondialdehyde (MDA) content was measured using  
632 a TBARS (thiobarbituric acid reactive substances) assay kit (OxiSelect; Cell Biolabs, San Diego,  
633 CA, USA). Cellular oxidative stress results in the production of unstable lipid peroxides, which  
634 decompose into products such as MDA (Kappus, 1985). The TBARS assay is based on MDA's  
635 reactivity with thiobarbituric acid (TBA) via an acid-catalyzed nucleophilic-addition reaction. The  
636 fluorescent 1 MDA:2 TBA adduct that results from the above reaction has an absorbance  
637 maximum at 532 nm and can be measured calorimetrically (Kappus, 1985; Janero, 1990). The one-  
638 hundred  $\mu\text{L}$  of sample was incubated with 100  $\mu\text{L}$  of sodium dodecyl sulfate lysis solution in a  
639 microcentrifuge tube for 5 min at room temperature. Thiobarbituric acid (250  $\mu\text{L}$ ) was added to  
640 each sample and incubated at 95°C for 1 h. After cooling to room temperature on ice for 5 min,  
641 samples were centrifuged at 3000 rpm for 15 min. The supernatant (200  $\mu\text{L}$ ) was transferred to a  
642 96-well microplate, and the absorbance was read at 532 nm. A dilution series of MDA standards  
643 (in the concentration range of 0 to 125  $\mu\text{M}$ ) was prepared by diluting the MDA standard in  
644 deionized water and used to prepare a standard curve. MDA content of the samples was determined  
645 and expressed as  $\mu\text{mol } 200 \text{ mg}^{-1}$  of stalk tissue (fresh weight).

646

#### 647 **Statistical analysis of functional assay data**

648

649 The PROC GLIMMIX procedure of SAS software version 9.2 (SAS Institute, 2008) was used to  
650 analyze the functional ROS/RNS assay, peroxidase activity, catalase activity, SOD activity, and  
651 lipid peroxidation assay data for variance (ANOVA). Variance components for two fixed factors,  
652 genotype, and inoculation treatment, were estimated using the restricted maximum likelihood  
653 (REML) method at each post-inoculation stage (4, 7, and 10 DPI). The assumptions of identical

654 and independent distribution of residuals and their normality were tested using studentized residual  
655 plots and Q-Q plots, respectively. Whenever residuals were not homogenously distributed,  
656 appropriate heterogeneous variance models were fitted to meet the model assumptions. For this, a  
657 random/group statement (group = genotype or inoculation treatment) was specified after the model  
658 statement. The most parsimonious model was selected using Bayesian information criterion (BIC).  
659 Means were separated using the PROC GLMMIX procedure of SAS. Main effects of factors were  
660 determined using the Tukey-Kramer test with the adjustments for multiple comparisons. The  
661 simple effects of the inoculation treatment were determined at each genotype level (four  
662 genotypes), whenever genotype  $\times$  treatment interaction was statistically significant. As inoculation  
663 treatment comprised only two levels (control and *M. phaseolina*), there was no a need to adjust the  
664 critical *P*-values for multiple comparisons.

665

666

## 667 **ACKNOWLEDGEMENTS**

668

669 The Kansas Grain Sorghum Commission is gratefully acknowledged for their financial support of  
670 this research. Authors also wish to thank Dr. Philine Wangemann and Mr. Joel Sanneman for their  
671 valuable advice and technical assistance during the confocal microscopic studies performed at the  
672 College of Veterinary Medicine Confocal Core, Kansas State University. This paper is  
673 Contribution No. 19-###-J from the Kansas Agricultural Experiment Station, Manhattan.

674

675

676

677 **LITERATURE CITED**

678

679 1. Allan, A. C., and Fluhr, R. 1997. Two distinct sources of elicited reactive oxygen species  
680 in tobacco epidermal cells. *Plant Cell* 9:1559-1572.

681

682 2. Aly, A. A., Abdel-Sattar, M. A., Omar, M. R., and Abd-Elsalam, K. A. 2007. Differential  
683 antagonism of *Trichoderma* sp. against *Macrophomina phaseolina*. *J Plant Prot Res.* 47:91-  
684 102.

685

686 3. Arora, A., Sairam, R. K., and Srivastava, G. C. 2002. Oxidative stress and antioxidative  
687 system in plants. *Curr. Sci.* 82:1227-1238.

688

689 4. Asai, S., Mase, K., and Yoshioka, H. 2010. Role of nitric oxide and reactive oxygen species  
690 in disease resistance to necrotrophic pathogens. *Plant Signal Behav.* 5:872-874.

691

692 5. Auh, C. K., and Murphy, T. M. 1995. Plasma membrane redox enzyme is involved in the  
693 synthesis of O<sub>2</sub><sup>-</sup> and H<sub>2</sub>O<sub>2</sub> by *Phytophthora* elicitor-stimulated rose cells. *Plant Physiol.*  
694 107: 1241-1247.

695

696 6. Bandara, Y. M. A. Y., Tesso, T. T., Zhang, K., Wang, D., and Little, C. R. 2018a. Charcoal  
697 rot and Fusarium stalk rot diseases influence sweet sorghum sugar attributes. *Ind. Crops*  
698 *Prod.* 112:188-195.

699

- 700 7. Bandara, Y.M.A.Y., Weerasooriya, D.K., Liu, S. and Little, C.R., 2018b. The necrotrophic  
701 fungus *Macrophomina phaseolina* promotes charcoal rot susceptibility in grain sorghum  
702 through induced host cell wall-degrading enzymes. *Phytopathology* 108:948-956.  
703
- 704 8. Bandara, Y. M. A. Y., Tesso, T. T., Bean, S. R., Dowell, F. E., and Little, C. R. 2017a.  
705 Impacts of fungal stalk rot pathogens on physicochemical properties of sorghum grain.  
706 *Plant Dis.* 101:2059-2065.  
707
- 708 9. Bandara, Y. M. A. Y., Weerasooriya, D. K., Tesso, T. T., Prasad, P.V.V., and Little, C. R.  
709 2017b. Stalk rot fungi affect grain sorghum yield components in an inoculation stage-  
710 specific manner. *Crop prot.* 94:97-105.  
711
- 712 10. Bandara, Y. M. A. Y., Weerasooriya, D. K., Tesso, T. T., and Little, C. R. 2017c. Stalk rot  
713 diseases impact sweet sorghum biofuel traits. *BioEnergy Res.* 10:26-35.  
714
- 715 11. Bandara, Y. M. A. Y., Weerasooriya, D. K., Tesso, T. T., and Little, C. R. 2016. Stalk Rot  
716 Fungi affect leaf greenness (SPAD) of grain sorghum in a genotype-and growth-stage-  
717 specific manner. *Plant Dis.* 100:2062-2068.  
718
- 719 12. Bandara, Y. M. A. Y., Perumal, R., and Little, C. R. 2015. Integrating resistance and  
720 tolerance for improved evaluation of sorghum lines against *Fusarium* stalk rot and charcoal  
721 rot. *Phytoparasitica* 43:485-499.  
722



- 723 13. Benjamini, Y., and Hochberg, Y. 1995. Controlling the false discovery rate: a practical and  
724 powerful approach to multiple testing. *J R Stat Soc Series B Stat Methodol.* 57: 289-300.  
725
- 726 14. Bhattacharya, D., Dhar, T. K., and Ali, E. 1992. An enzyme immunoassay of phaseolinone  
727 and its application in estimation of the amount of toxin in *Macrophomina phaseolina*-  
728 infected seeds. *Appl. Environ. Microbiol.* 77:1970-1974.  
729
- 730 15. Bonfoco, E., Krainc, D., Ankarcona, M., Nicotera, P., and Lipton, S. A. 1995. Apoptosis  
731 and necrosis: two distinct events induced, respectively, by mild and intense insults with  
732 N-methyl- D-aspartate or nitric oxide/superoxide in cortical cell cultures. *Proc. Natl. Acad.*  
733 *Sci. U.S.A.* 92:7162-7166.  
734
- 735 16. Chamnongpol, S., Willekens, H., Langebartels, C., Van Montagu, M., Inzé, D., and Van  
736 Camp, W. 1996. Transgenic tobacco with a reduced catalase activity develops necrotic  
737 lesions and induces pathogenesis-related expression under high light. *Plant J.* 10:491-503.  
738
- 739 17. Choquer, M., Fournier, E., Kunz, C., Levis, C., Pradier, J. M., Simon, A., and Viaud, M.  
740 2007. *Botrytis cinerea* virulence factors: new insights into a necrotrophic and  
741 polyphageous pathogen. *FEMS Microbiol Lett.* 277:1-10.  
742
- 743 18. Chen, Z., Silva, H., and Klessig, D. F. 1993. Active oxygen species in the induction of  
744 plant systemic acquired resistance by salicylic acid. *Science* 262:1883-1886.  
745

- 746 19. Cona, A., Rea, G., Angelini, R., Federico, R., and Tavladoraki, P. 2006. Functions of amine  
747 oxidases in plant development and defense. *Trends Plant Sci.* 11:80-88.  
748
- 749 20. Corpas, F.J., Barroso, J.B., Carreras, A., Quirós, M., León, A.M., Romero-Puertas, M.C.,  
750 Esteban, F.J., Valderrama, R., Palma, J.M., Sandalio, L.M. and Gómez, M. 2004. Cellular  
751 and subcellular localization of endogenous nitric oxide in young and senescent pea plants.  
752 *Plant Physiol.* 136:2722-2733.  
753
- 754 21. Dangl, J. L., and Jones, J. D. G. 2001. Plant pathogens and integrated defence responses to  
755 infection. *Nature* 411:826-833.  
756
- 757 22. De, B. K., Chattopadhyaya, S. B., and Arjunan, G. 1992. Effect of potash on stem rot diseases  
758 of jute caused by *Macrophomina phaseolina*. *J Mycopathol Res.* 30: 51-55.  
759
- 760 23. Debona, D., Rodrigues, F. Á., Rios, J. A., and Nascimento, K. J. T. 2012. Biochemical  
761 changes in the leaves of wheat plants infected by *Pyricularia oryzae*. *Phytopathology* 102:  
762 1121-1129.  
763
- 764 24. Delledonne, M., Zeier, J., Marocco, A., and Lamb, C. 2001. Signal interactions between  
765 nitric oxide and reactive oxygen intermediates in the plant hypersensitive disease resistance  
766 response. *Proc. Natl. Acad. Sci. U.S.A.* 98:13454-13459.  
767

- 768 25. Delledonne, M., Xia, Y., Dixon, R. A., and Lamb, C. 1998. Nitric oxide functions as a  
769 signal in plant disease resistance. *Nature* 394: 585-588.  
770
- 771 26. Doke, N. 1983. Involvement of superoxide anion generation in the hypersensitive response  
772 of potato tuber tissues to infection with an incompatible race of *Phytophthora infestans* and  
773 to the hyphal wall components. *Physiol Mol Plant Pathol.* 23:345-357.  
774
- 775 27. Draper, J. 1997. Salicylate, superoxide synthesis and cell suicide in plant defense. *Trends*  
776 *Plant Sci.* 2:162-165.  
777
- 778 28. Dugas, D. V., Monaco, M. K., Olsen, A., Klein, R. R., Kumari, S., Ware, D., and Klein, P.  
779 E. 2011. Functional annotation of the transcriptome of *Sorghum bicolor* in response to  
780 osmotic stress and abscisic acid. *BMC Genomics* 12: 514.  
781
- 782 29. Durner, J., Wendehenne, D. and Klessig, D. F. (1998). Defense gene induction in tobacco  
783 by nitric oxide, cyclic GMP, and cyclic ADP-ribose. *Proc. Natl. Acad. Sci. U.S.A.*  
784 95:10328-10333.  
785
- 786 30. Edmunds, L. 1964. Combined relation of plant maturity temperature soil moisture to  
787 charcoal stalk rot development in grain sorghum. *Phytopathology* 54: 513-517.  
788

- 789 31. Foley, R. C., Kidd, B. N., Hane, J. K., Anderson, J. P., and Singh, K. B. 2016. Reactive  
790 oxygen species play a role in the infection of the necrotrophic fungi, *Rhizoctonia solani* in  
791 wheat. PloS One 11: e0152548.
- 792
- 793 32. Fortunato, A. A., Debona, D., Bernardeli, A. M. A., and Rodrigues, F. Á. 2015. Changes  
794 in the antioxidant system in soybean leaves infected by *Corynespora cassiicola*.  
795 Phytopathology 105:1050-1058.
- 796
- 797 33. Gill, S. S. and Tuteja, N. 2010. Reactive oxygen species and antioxidant machinery in  
798 abiotic stress tolerance in crop plants. Plant Physiol Biochem. 48:909-930.
- 799
- 800 34. Göbel, C., Feussner, I., and Rosahl, S. 2003. Lipid peroxidation during the hypersensitive  
801 response in potato in the absence of 9-lipoxygenases. J Biol Chem. 278: 52834-52840.
- 802
- 803 35. Goodstein, D.M., Shu, S., Howson, R., Neupane, R., Hayes, R.D., Fazo, J., Mitros, T.,  
804 Dirks, W., Hellsten, U., Putnam, N., and Rokhsar, D.S. 2012. Phytozome: a comparative  
805 platform for green plant genomics. Nucleic Acids Res. 40:1178-1186.
- 806
- 807 36. Govrin, E., and Levine, A. 2000. The hypersensitive response facilitates plant infection by  
808 the necrotrophic pathogen *Botrytis cinerea*. Curr Biol. 10:751-757.
- 809
- 810 37. Grant, M., Brown, I., Adams, S., Knight, M., Ainslie, A., and Mansfield, J. 2000. The  
811 RPM1 plant disease resistance gene facilitates a rapid and sustained increase in cytosolic

- 812 calcium that is necessary for the oxidative burst and hypersensitive cell death. *Plant J.*  
813 23:441-450.
- 814
- 815 38. Graziano, M., and Lamattina, L. 2005. Nitric oxide and iron in plants: an emerging and  
816 converging story. *Trends Plant Sci.* 10:4-8.
- 817
- 818 39. Halliwell, B., and Gutteridge, J. M. C. 1989. *Free Radicals in Biology and Medicine* (2nd  
819 ed.). Oxford, UK: Clarendon.
- 820
- 821 40. Hammond-Kosack, K. E., and Jones, J. D. 1996. Resistance gene-dependent plant defense  
822 responses. *Plant Cell* 8:1773-1791.
- 823
- 824 41. Hundekar, A., and Anahosur, K. 2012. Pathogenicity of fungi associated with sorghum  
825 stalk rot. *Karnataka Journal of Agricultural Sciences* 7: 291-295.
- 826
- 827 42. Islam, M. S., Haque, M. S., Islam, M. M., Emdad, E. M., Halim, A., Hossen, Q. M. M.,  
828 Hossain, M. Z., Ahmed, B., Rahim, S., Rahman, M. S., and Alam, M. M. 2012. Tools to  
829 kill: Genome of one of the most destructive plant pathogenic fungi *Macrophomina*  
830 *phaseolina*. *BMC Genomics* 13:493.
- 831
- 832 43. Jalloul, A., Montillet, J. L., Assigbetsé, K., Agnel, J. P., Delannoy, E., Triantaphylides, C.,  
833 and Nicole, M. 2002. Lipid peroxidation in cotton: *Xanthomonas* interactions and the role  
834 of lipoxygenases during the hypersensitive reaction. *Plant J.* 32:1-12.

- 835
- 836 44. Janero, D. R. 1990. Malondialdehyde and thiobarbituric acid-reactivity as diagnostic
- 837 indices of lipid peroxidation and peroxidative tissue injury. *Free Radic Biol Med.* 9:515-
- 838 540.
- 839
- 840 45. Jones, J. D., and Dangl, J. L. 2006. The plant immune system. *Nature* 444:323-329.
- 841
- 842 46. Kappus, H. 1985. Lipid peroxidation: mechanisms, analysis, enzymology and biological
- 843 relevance. Pages 273-310 in: *Oxidative stress*. H. Sies, ed. Academic Press London, UK.
- 844
- 845 47. Karuppanapandian, T., Moon, J. C., Kim, C., Manoharan, K., and Kim, W. 2011. Reactive
- 846 oxygen species in plants: their generation, signal transduction, and scavenging
- 847 mechanisms. *Aust J Crop Sci.* 5:709-725.
- 848
- 849 48. Kerwin, J. F., Lancaster, J. R., and Feldman, P. L. 1995. Nitric oxide: a new paradigm for
- 850 second messengers. *J Med Chem.* 38:4343-4362.
- 851
- 852 49. Kim, H. J., Chen, C., Kabbage, M., and Dickman, M. B. 2011. Identification and
- 853 Characterization of *Sclerotinia sclerotiorum* NADPH Oxidases. *Appl Environ Microbiol.*
- 854 77:7721-7729.
- 855

- 856 50. Kimber, C. T., Dahlberg, J. A., and Kresovich, S. 2013. The gene pool of *Sorghum bicolor*  
857 and its improvement. Pages 23-41 in: *Genomics of the Saccharinae*. A.H. Paterson, ed.  
858 Springer, New York.
- 859
- 860 51. Kiproviski, B., Malencic, D., Popovic, M., Budakov, D., Stojšin, V., and Balešević-Tubić,  
861 S. 2012. Antioxidant systems in soybean and maize seedlings infected with *Rhizoctonia*  
862 *solani*. *J Plant Pathol*. 94:313-324.
- 863
- 864 52. Kliebenstein, D. J., and Rowe, H. C. 2008. Ecological costs of biotrophic versus  
865 necrotrophic pathogen resistance, the hypersensitive response and signal transduction.  
866 *Plant Sci*.174: 551-556.
- 867
- 868 53. Kojima, H., Urano, Y., Kikuchi, K., Higuchi, T., Hirata, Y., and Nagano, T. 1999.  
869 Fluorescent indicators for imaging nitric oxide production. *Angew Chem Int Ed*. 38:3209-  
870 3212.
- 871
- 872 54. Koppenol, W. H., Moreno, J. J., Pryor, W. A., Ischiropoulos, H., and Beckman, J. S. 1992.  
873 Peroxynitrite, a cloaked oxidant formed by nitric oxide and superoxide. *Chem Res Toxicol*.  
874 5:834-842.
- 875
- 876 55. Kuźniak, E., and Skłodowska, M. 2005. Fungal pathogen-induced changes in the  
877 antioxidant systems of leaf peroxisomes from infected tomato plants. *Planta* 222:192-200.
- 878

- 879 56. Malenčić, D., Kiproviski, B., Popović, M., Prvulović, D., Miladinović, J., and Djordjević,  
880 V. 2010. Changes in antioxidant systems in soybean as affected by *Sclerotinia sclerotiorum*  
881 (Lib.) de Bary. *Plant Physiol Biochem.* 48:903-908.  
882
- 883 57. Martin, M. 2011. Cutadapt removes adapter sequences from high-throughput sequencing  
884 reads. *EMBnet J.* 17:10-12.  
885
- 886 58. Mayek-Pérez, N., López-Castañeda, C., López-Salinas, E., Cumpián-Gutiérrez, J., and  
887 Acosta-Gallegos, J. A. 2001. *Macrophomina phaseolina* resistance in common bean under  
888 field conditions in Mexico. *Agrociencia* 46:649-661.  
889
- 890 59. Mittler, R. 2002. Oxidative stress, antioxidants and stress tolerance. *Trends Plant Sci.* 7:  
891 405-410.  
892
- 893 60. Mittler, R., Herr, E. H., Orvar, B. L., van Camp, W., Wilikens, H., Inzé, D., and Ellis, B. E.  
894 1999. Transgenic tobacco plants with reduced capability to detoxify reactive oxygen  
895 intermediates are hyperresponsive to pathogen infection. *Proc. Natl. Acad. Sci. U.S.A.* 96:  
896 14165-14170.  
897
- 898 61. Moller, I. M. 2001. Plant mitochondria and oxidative stress: Electron transport, NADPH  
899 turnover, and metabolism of reactive oxygen species. *Annu Rev Plant Physiol Plant Mol*  
900 *Biol.* 52:561-591.  
901



- 902 62. Murphy, M. P. 1999. Nitric oxide and cell death. *BBA-Bioenergetics* 1411:401-414.
- 903
- 904 63. Nebert, D. W., Roe, A. L., Dieter, M. Z., Solis, W. A., Yang, Y., and Dalton, T. P. 2000.
- 905 Role of the aromatic hydrocarbon receptor and [*Ah*] gene battery in the oxidative stress
- 906 response, cell cycle control, and apoptosis. *Biochem Pharmacol.* 59:65-85.
- 907
- 908 64. Pacher, P., Beckman, J.S., and Liaudet, L. 2007. Nitric oxide and peroxynitrite in health
- 909 and disease. *Physiol Rev.* 87:315-424.
- 910
- 911 65. Paterson, A.H., Bowers, J.E., Bruggmann, R., Dubchak, I., Grimwood, J., Gundlach, H.,
- 912 Haberer, G., Hellsten, U., Mitros, T., Poliakov, A. and Schmutz, J. 2009. The *Sorghum*
- 913 *bicolor* genome and the diversification of grasses. *Nature* 457:551-556.
- 914
- 915 66. Perchepped, L., Balagué, C., Riou, C., Claudel-Renard, C., Rivière, N., Grezes-Beset, B.,
- 916 and Roby, D. 2010. Nitric oxide participates in the complex Interplay of defense-related
- 917 signaling pathways controlling disease resistance to *Sclerotinia sclerotiorum* in
- 918 *Arabidopsis thaliana*. *Mol Plant Microbe Interact.* 23:846-860.
- 919
- 920 67. Planchet, E., and Kaiser, W. M. 2006. Nitric oxide production in plants: facts and fictions.
- 921 *Plant Signal Behav.* 1:46-51.
- 922

- 923 68. Polidoros, A. N., Mylona, P. V., and Scandalios, J. P. 2001. Transgenic tobacco plants  
924 expressing the maize *Cat2* gene have altered catalase levels that affect plant-pathogen  
925 interactions and resistance to oxidative stress. *Transgenic Res.* 10:555-569.  
926
- 927 69. Raguchander, T., Samiyappan, R., and Arjunan, G. 1993. Biocontrol of *Macrophomina*  
928 root rot of mungbean. *Indian Phytopath.* 46:379-382.  
929
- 930 70. Rosenow, D., Quisenberry, J., Wendt, C., and Clark, L. 1983. Drought tolerant sorghum  
931 and cotton germplasm. *Agric Water Manag.* 7:207-222.  
932
- 933 71. Sagi, M., and Fluhr, R. 2006. Production of reactive oxygen species by plant NADPH  
934 oxidases. *Plant Physiol.* 141:336-340.  
935
- 936 72. Sagi, M., and Fluhr, R. 2001. Superoxide production by plant homologues of the gp91phox  
937 NADPH oxidase. Modulation of activity by calcium and by tobacco mosaic virus infection.  
938 *Plant Physiol.* 126:1281-1290.  
939
- 940 73. Sarkar, T. S., Biswas, P., Ghosh, S. K., and Ghosh, S. 2014. Nitric oxide production by  
941 necrotrophic pathogen *Macrophomina phaseolina* and the host plant in charcoal rot disease  
942 of jute: Complexity of the interplay between necrotroph–host plant interactions. *PloS One*  
943 9: e107348.  
944

- 945 74. Segmueller, N., Kokkelink, L., Giesbert, S., Odinius, D., van Kan, J., and Tudzynski, P.  
946 2008. NADPH Oxidases are involved in differentiation and pathogenicity in *Botrytis*  
947 *cinerea*. Mol Plant Microbe Interact. 21:808-819  
948
- 949 75. Sharma, P., Jha, A. B., Dubey, R. S., and Pessarakli, M. 2012. Reactive oxygen species,  
950 oxidative damage, and antioxidative defense mechanism in plants under stressful  
951 conditions. Journal of Botany 2012:1-22.  
952
- 953 76. Shetty, N. P., Jorgensen, H. J. L., Jensen, J. D., Collinge, D. B., and Shetty, H. S. 2008.  
954 Roles of reactive oxygen species in interactions between plants and pathogens. Eur J Plant  
955 Pathol. 121:267-280.  
956
- 957 77. Stone, J. K. 2001. Necrotrophs. Encyclopedia of Plant Pathology 2:676-677.  
958
- 959 78. Su, G., Suh, S. O., Schneider, R. W., and Russin, J. S. 2001. Host Specialization in the  
960 Charcoal Rot Fungus, *Macrophomina phaseolina*. Phytopathology 91:120-126.  
961
- 962 79. Takahashi, H., Chen, Z., Du, H., Liu, Y., and Klessig, D. F. 1997. Development of necrosis  
963 and activation of disease resistance in transgenic tobacco plants with severely reduced  
964 catalase levels. Plant J. 11:993-1005.  
965

- 966 80. Tarr, S. A. J. 1962. Root and stalk diseases: Red stalk rot, Colletotrichum rot, anthracnose,  
967 and red leaf spot. Pages 58-73 in: Diseases of Sorghum, Sudan Grass and Brown Corn.  
968 Commonwealth Mycological Institute, Kew, Surrey, UK.  
969
- 970 81. Tesso, T., Perumal, R., Little, C. R., Adeyanju, A., Radwan, G. L., Prom, L. K., and Magill,  
971 C. W. 2012. Sorghum pathology and biotechnology-a fungal disease perspective: Part II.  
972 Anthracnose, stalk rot, and downy mildew. Eur J Plant Sci Biotechnol. 6: 31-44.  
973
- 974 82. Torres, M. A., Dangl, J. L., and Jones, J. D. G. 2002. *Arabidopsis* gp91<sup>phox</sup> homologues  
975 *AtrbohD* and *AtrbohF* are required for accumulation of reactive oxygen intermediates in  
976 the plant defense response. Proc. Natl. Acad. Sci. U.S.A 99:517-522.  
977
- 978 83. Troy, C. M., Derossi, D., Prochiantz, A., Greene, L. A., and Shelanski, M. L. 1996.  
979 Downregulation of Cu/Zn superoxide dismutase leads to cell death via the nitric oxide-  
980 peroxynitrite pathway. J Neurosci. 16:253-261.  
981
- 982 84. Vanacker, H., Carver, T. L., and Foyer, C. H. 2000. Early H<sub>2</sub>O<sub>2</sub> accumulation in mesophyll  
983 cells leads to induction of glutathione during the hyper-sensitive response in the barley-  
984 powdery mildew interaction. Plant Physiol. 123:1289-1300.  
985
- 986 85. Vandelle, E., and Delledonne, M. 2011. Peroxynitrite formation and function in plants.  
987 Plant Sci. 181:534-539.  
988

- 989 86. van Baarlen, P., Staats, M., and van Kan, J. A. L. 2004. Induction of programmed cell death  
990 in lily by the fungal pathogen *Botrytis elliptica*. *Mol Plant Pathol.* 5:559-574.  
991
- 992 87. van Kan, J. A. 2006. Licensed to kill: the lifestyle of a necrotrophic plant pathogen. *Trends*  
993 *Plant Sci.* 11:247-253.  
994
- 995 88. Willekens, H., Chamnongpol, S., Davey, M., Schraudner, M., Langebartels, C., Van  
996 Montagu, M., Inzé, D. and Van Camp, W. 1997. Catalase is a sink for H<sub>2</sub>O<sub>2</sub> and is  
997 indispensable for stress defence in C3 plants. *EMBO J.* 16:4806-4816.  
998
- 999 89. Wimalasekera, R., Tebartz, F., and Scherer, G. F. 2011. Polyamines, polyamine oxidases  
1000 and nitric oxide in development, abiotic and biotic stresses. *Plant Sci.* 181:593-603.  
1001
- 1002 90. Wu, T.D., and Watanabe, C.K. 2005. GMAP: a genomic mapping and alignment program  
1003 for mRNA and EST sequences. *Bioinformatics* 21:1859-1875.  
1004
- 1005 91. Wyllie, T. D. 1998. Soybean Diseases of the North Central Region. Pages 106-113 in:  
1006 Charcoal Rot of Soybean-Current Status. T. D. Wyllie and D. H. Scott, eds. American  
1007 Phytopathological Society, St. Paul, MN.  
1008
- 1009 92. Yang, S. L., and Chung, K. R. 2012. The NADPH oxidase-mediated production of  
1010 hydrogen peroxide (H<sub>2</sub>O<sub>2</sub>) and resistance to oxidative stress in the necrotrophic pathogen  
1011 *Alternaria alternata* of citrus. *Mol Plant Pathol.* 13:900-914.

1012

1013 93. Yoshioka, H., Mase, K., Yoshioka, M., Kobayashi, M., and Asai, S. 2011. Regulatory

1014 mechanisms of nitric oxide and reactive oxygen species generation and their role in plant

1015 immunity. *Nitric Oxide* 25:216-221.

1016

1017 **Table 1.** P-values of F-statistic from analysis of variance (ANOVA) for reactive oxygen/nitrogen  
 1018 species (ROS/RNS), peroxidase activity (PX), catalase activity (CAT), superoxide dismutase  
 1019 activity (SOD), and TBARS assay for malondialdehyde content measured at 4, 7, and 10 days post  
 1020 inoculation (DPI). All assays were based on cell extracts isolated from charcoal rot resistant  
 1021 (SC599, SC35) and susceptible (Tx7000, BTx3042) sorghum genotypes after inoculation with  
 1022 *Macrophomina phaseolina* and phosphate buffered saline (mock-inoculated control) ( $\alpha = 0.05$ ).  
 1023

| DPI | Effect             | Pr > F  |         |         |         |         |
|-----|--------------------|---------|---------|---------|---------|---------|
|     |                    | ROS/RNS | PX      | CAT     | SOD     | TBARS   |
| 4   | Genotype           | 0.0279  | <0.0001 | 0.0002  | 0.0151  | 0.0024  |
|     | Treatment          | 0.0081  | <0.0001 | 0.0003  | 0.9888  | 0.0436  |
|     | Genotype*Treatment | 0.0044  | 0.0074  | 0.0103  | 0.3789  | 0.0212  |
| 7   | Genotype           | <0.0001 | <0.0001 | <0.0001 | 0.0067  | <0.0001 |
|     | Treatment          | 0.0538  | 0.0001  | 0.0006  | 0.0193  | 0.0197  |
|     | Genotype*Treatment | 0.0145  | 0.0183  | <0.0001 | 0.9799  | 0.0226  |
| 10  | Genotype           | <0.0001 | <0.0001 | <0.0001 | <0.0001 | 0.0007  |
|     | Treatment          | 0.0026  | 0.0013  | <0.0001 | 0.0416  | <0.0001 |
|     | Genotype*Treatment | 0.0009  | 0.0171  | <0.0001 | 0.5281  | 0.0068  |

1024

1025

1026

1027

1028

1029

1030 **Figure Legends**

1031

1032 **Figure 1.** Heat map depicting differentially expressed (A) reactive oxygen species [1, cytochrome  
1033 p450s; 2, NADPH oxidase; 3, NADH dehydrogenases; 4, amine oxidase and related; 5, copper  
1034 methylamine oxidase precursors], (B) nitric oxide [6, nitric oxide synthases; 7, nitrite reductases;  
1035 8, NADH-cytochrome b5 reductases], and (C) antioxidant system-associated [9, peroxidases; 10,  
1036 catalase; 11, superoxide dismutase] genes between charcoal rot resistant (SC599) and susceptible  
1037 (Tx7000) sorghum genotypes in response to *Macrophomina phaseolina* inoculation at 7 days post-  
1038 inoculation. Red, green, and black colors represent up-regulated, down-regulated, and non-  
1039 differentially expressed genes, respectively, after pathogen inoculation compared to mock-  
1040 inoculated control treatment with sterile phosphate-buffered saline. See Supplementary Table 1  
1041 for a detailed list of genes, differential expression levels, and q-values.

1042

1043 **Figure 2.** Comparison of the mean total free radical content (sum of the reactive oxygen and  
1044 nitrogen species as measured by dichlorodihydrofluorescein (DCF) concentration) among two  
1045 treatments (CON, MP) in charcoal rot susceptible (BTx3042, Tx7000) and resistant (SC599,  
1046 SC35) genotypes at 4, 7, and 10 days post-inoculation (DPI). Treatment means followed by  
1047 different letters within each genotype at a given DPI are significantly different. Treatment means  
1048 with "ns" designations are not significantly different within each genotype at a given DPI at  $\alpha =$   
1049 0.05. Error bars represent standard errors. CON = phosphate-buffered saline mock-inoculated  
1050 control, MP = *Macrophomina phaseolina*-inoculated.

1051



1052 **Figure 3.** (A) Detection of nitric oxide (NO) in sorghum stem tissues after staining with 4-amino-  
1053 5-methylamino-2',7'-difluorofluorescein diacetate (DAF FM-DA) by confocal microscopy. Cross-  
1054 section of a single vascular bundle ("vb") of the charcoal rot susceptible and resistant sorghum  
1055 genotypes, Tx7000 and SC599, respectively, after receiving the *Macrophomina phaseolina* (MP;  
1056 1st and 3rd rows) and mock-inoculated control (phosphate-buffered saline) treatments (2nd and  
1057 4th rows) at 7 days post-inoculation (DPI) (Magnification = 200×). (B) Cross-sections showing  
1058 the vascular bundles and surrounding parenchyma (pith) cells of charcoal rot susceptible  
1059 (BTx3042, Tx7000) and resistant (SC35, SC599) sorghum genotypes after receiving the *M.*  
1060 *phaseolina* and mock-inoculated control treatments at 7 DPI (Magnification = 25×). Stem cross-  
1061 sections showing bright green fluorescence correspond to the detection of NO. Lack of bright green  
1062 in the “fluorescence” and “overlay” micrographs indicate the absence of NO after both treatments.  
1063 Red color corresponds to chlorophyll autofluorescence. pc = parenchyma cells

1064

1065 **Figure 4.** Comparison of the mean peroxidase activity among two treatments (CON, MP) in  
1066 charcoal rot susceptible (BTx3042, Tx7000) and resistant (SC599, SC35) genotypes at 4, 7, and  
1067 10 days post-inoculation (DPI). Treatment means followed by different letters within each  
1068 genotype at a given DPI are significantly different while the treatment means with "ns"  
1069 designations within each genotype at a given DPI are not significantly different at  $\alpha = 0.05$ . Error  
1070 bars represent standard errors. CON = phosphate-buffered saline mock-inoculated control, MP =  
1071 *Macrophomina phaseolina*-inoculated.

1072

1073 **Figure 5.** Comparison of the mean catalase activity among two treatments (CON, MP) in charcoal  
1074 rot susceptible (BTx3042, Tx7000) and resistant (SC599, SC35) genotypes at 4, 7, 10 days post-

1075 inoculation (DPI). Treatment means followed by different letters within each genotype at a given  
1076 DPI are significantly different while the treatment means with "ns" designations within each  
1077 genotype at a given DPI are not significantly different at  $\alpha = 0.05$ . Error bars represent standard  
1078 errors. CON = phosphate-buffered saline mock-inoculated control, MP = *Macrophomina*  
1079 *phaseolina*-inoculated.

1080

1081 **Figure 6.** Comparison of the mean superoxide dismutase activity (A) among two treatments (CON,  
1082 MP) across four sorghum genotypes (BTx3042, Tx7000, SC599, SC35) at 4, 7, and 10 days post-  
1083 inoculation (DPI) and (B) among four sorghum genotypes across two treatments at three post-  
1084 inoculation stages. Treatment means followed by different letters within a given DPI are  
1085 significantly different while the treatment means with "ns" designations are not significantly  
1086 different at  $\alpha = 0.05$ . Genotype means followed by different letters within a given DPI are  
1087 significantly different based on the adjusted *P*-value for multiple comparisons using Tukey-  
1088 Kramer's test at  $\alpha = 0.05$  while the genotype means with "ns" designations within a given DPI are  
1089 not significantly different. Error bars represent standard errors. CON = phosphate-buffered saline  
1090 mock-inoculated control, MP = *Macrophomina phaseolina*-inoculated.

1091

1092 **Figure 7.** Comparison of the mean malondialdehyde content among two treatments (CON, MP)  
1093 in charcoal rot-susceptible (BTx3042, Tx7000) and -resistant (SC599, SC35) genotypes at 4, 7,  
1094 and 10 days post-inoculation (DPI). Treatment means followed by different letters within each  
1095 genotype at a given DPI are significantly different. Treatments with "ns" designations are not  
1096 significantly different within each genotype at a given DPI at  $\alpha = 0.05$ . Error bars represent

1097 standard errors. CON = phosphate-buffered saline mock-inoculated control, MP = *Macrophomina*  
1098 *phaseolina*-inoculated.

1099

1100

1101

1102

1103

1104

1105

1106

1107

1108

1109

1110

1111

1112

1113

1114

1115

1116

1117

1118

1119

1120 **Figure 1.**

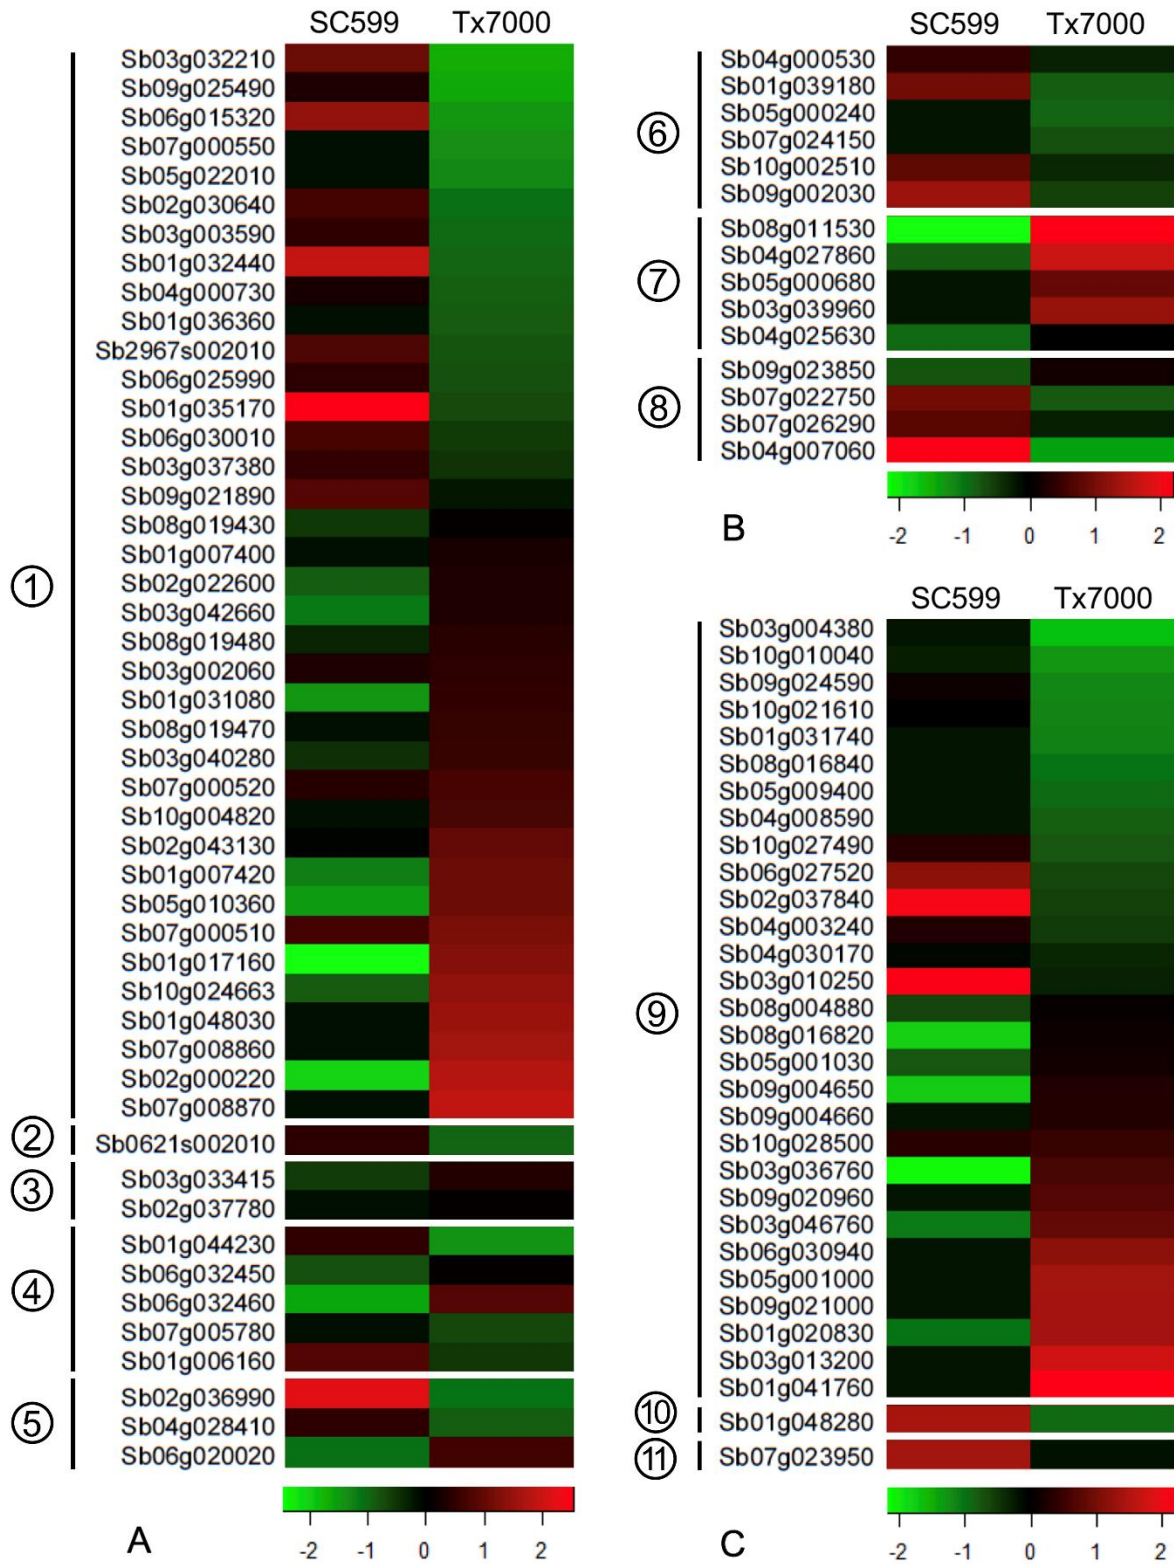

1121 **Figure 2.**

1122

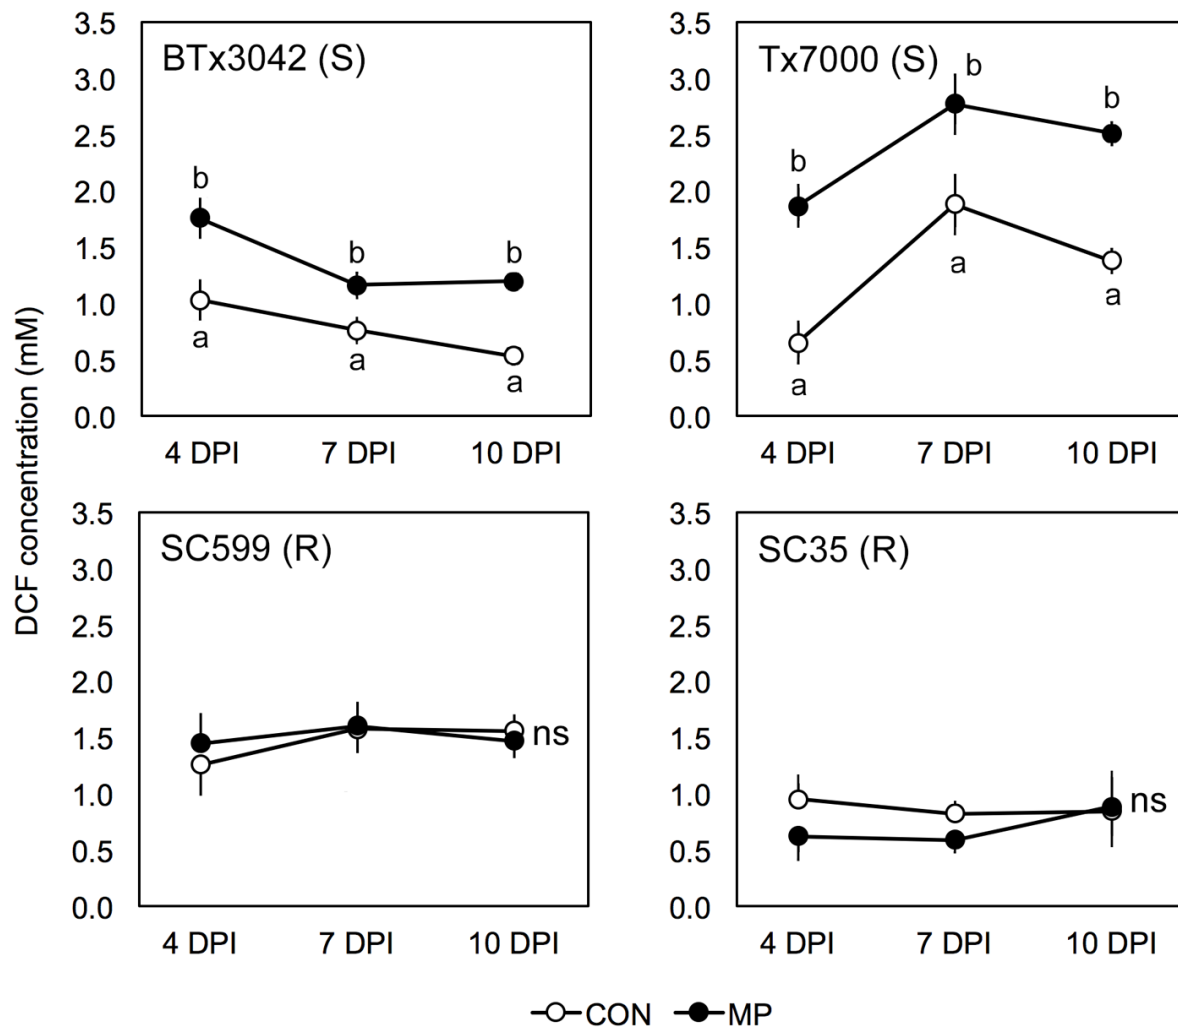

1123

1124

1125

1126

1127

1128

1129



1130 **Figure 3.**

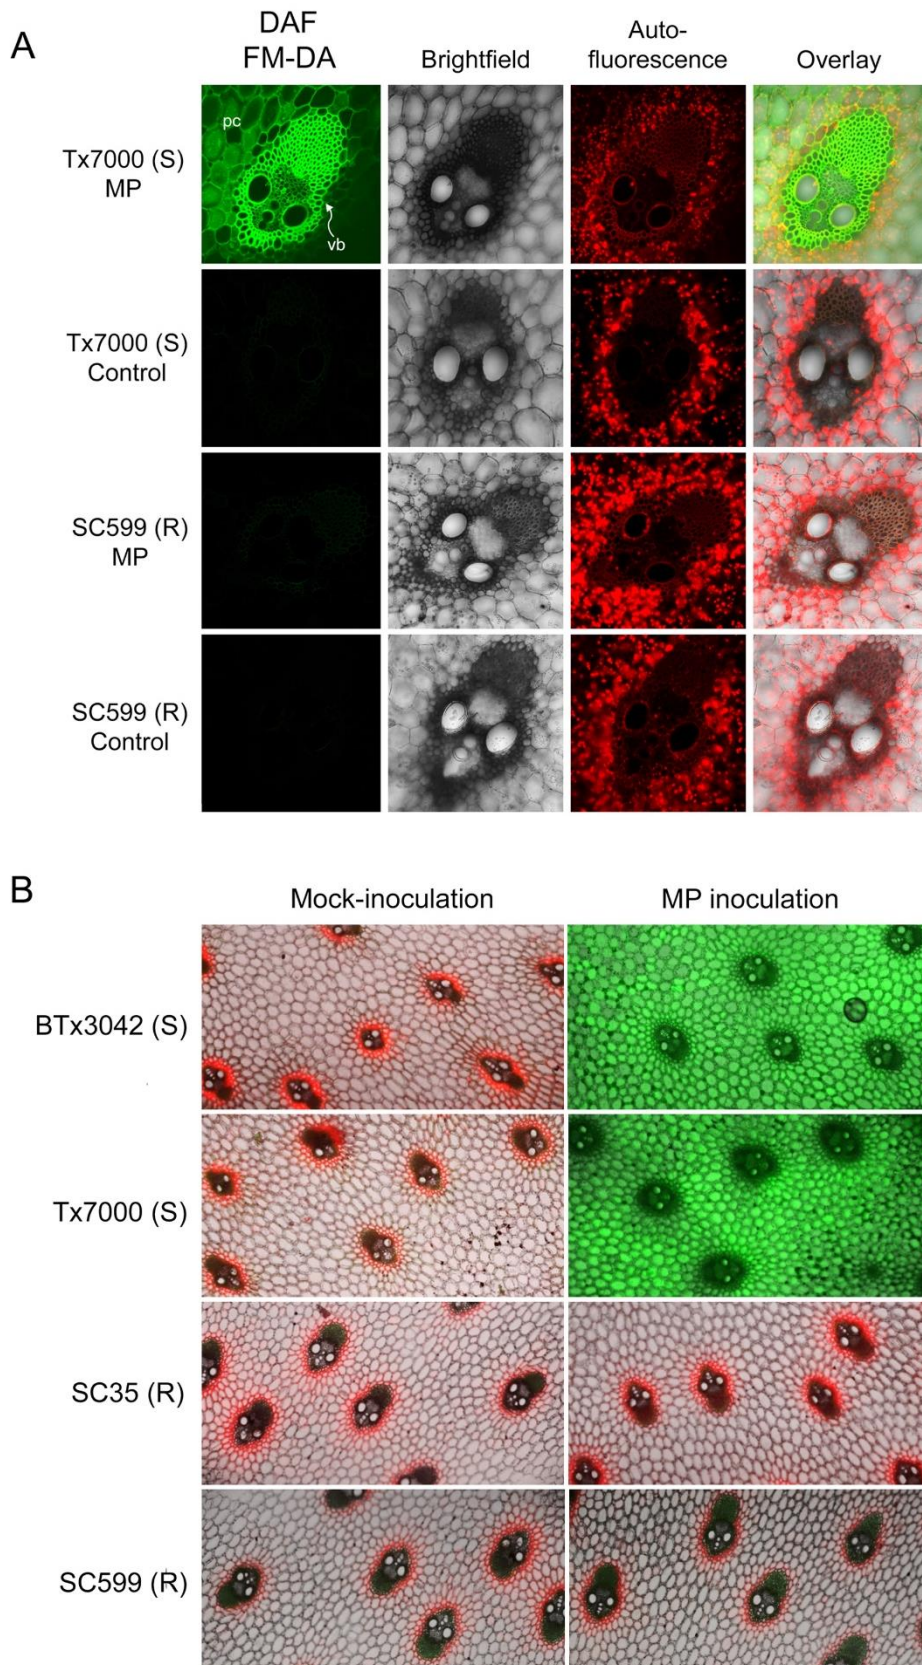

1132 **Figure 4.**

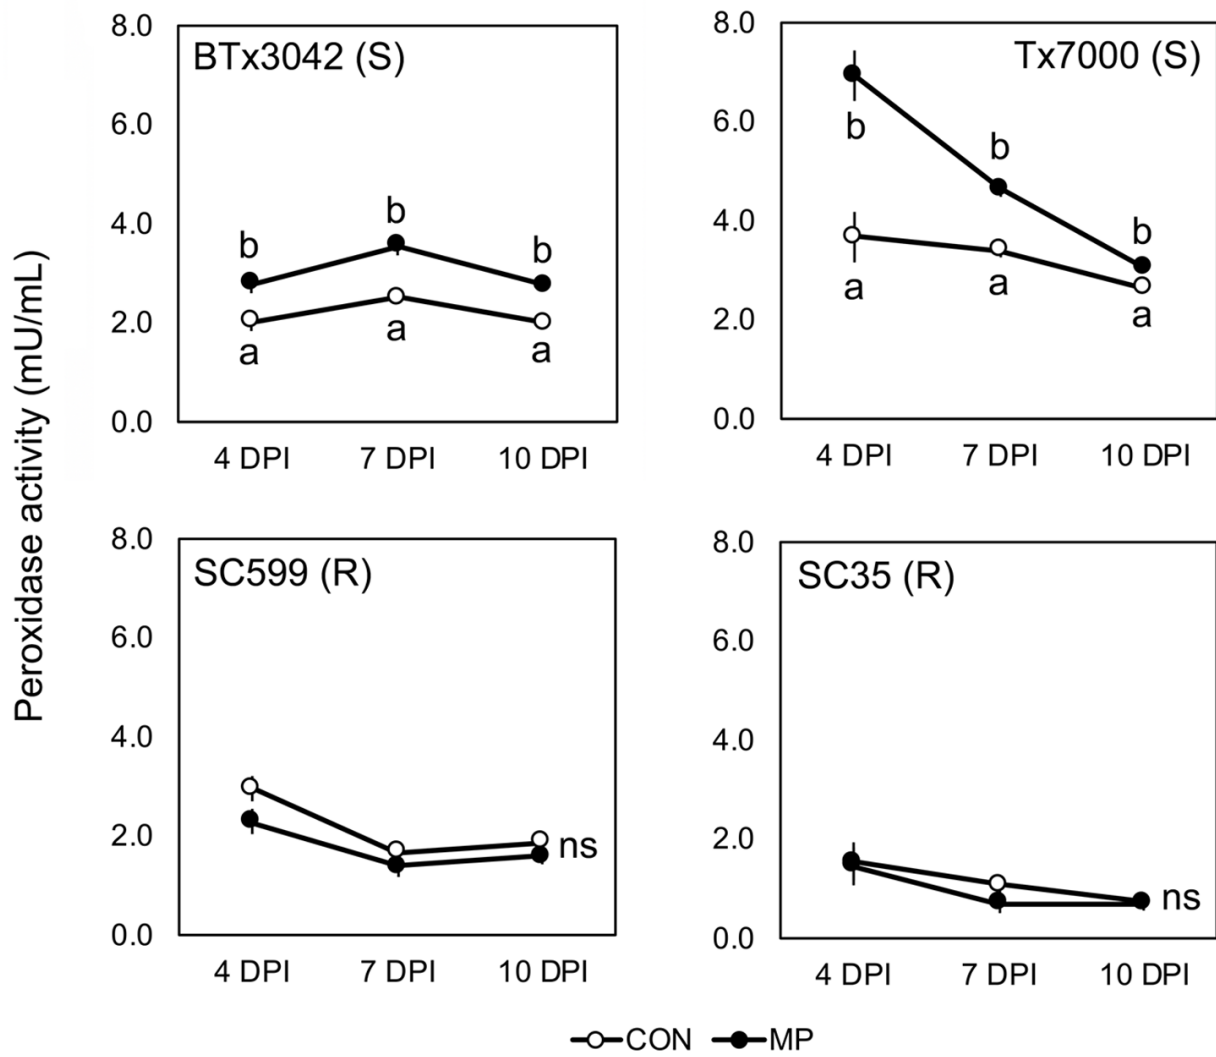

1133

1134

1135 **Figure 5.**

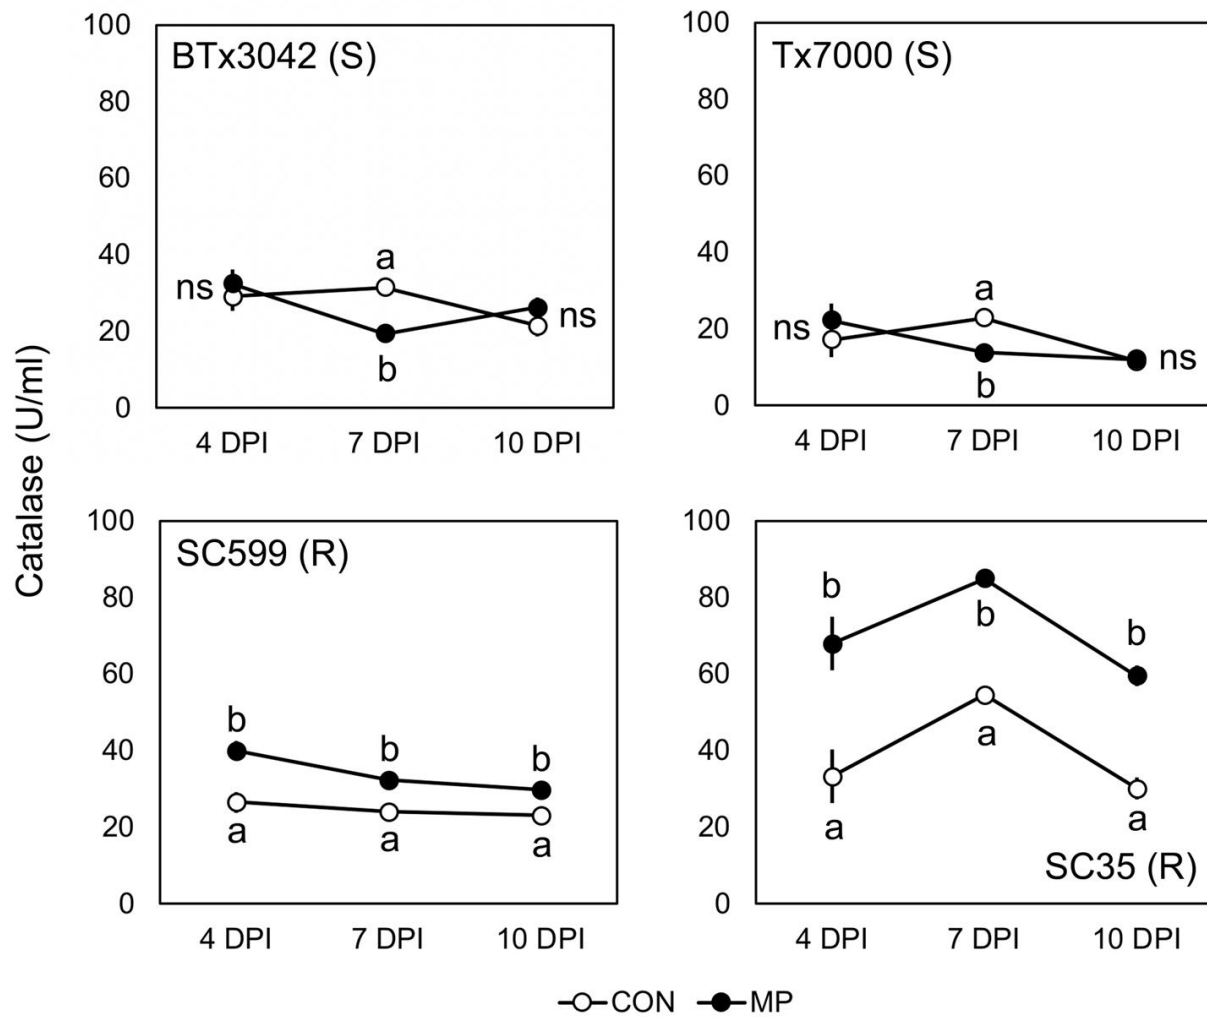

1136



1137 **Figure 6.**

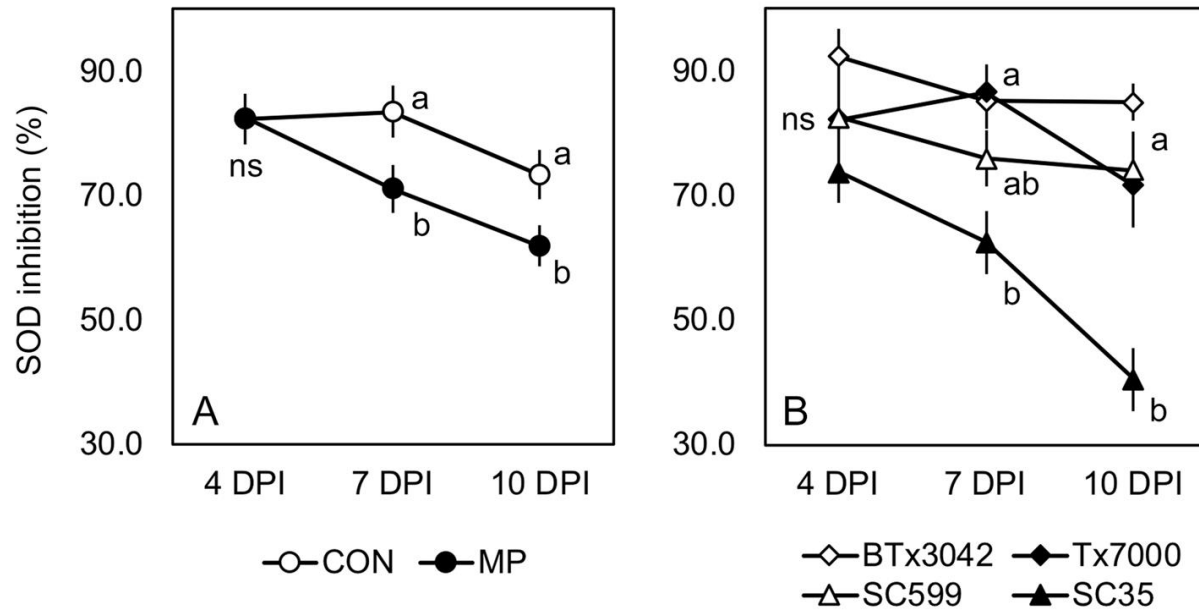

1138

1139 **Figure 7.**

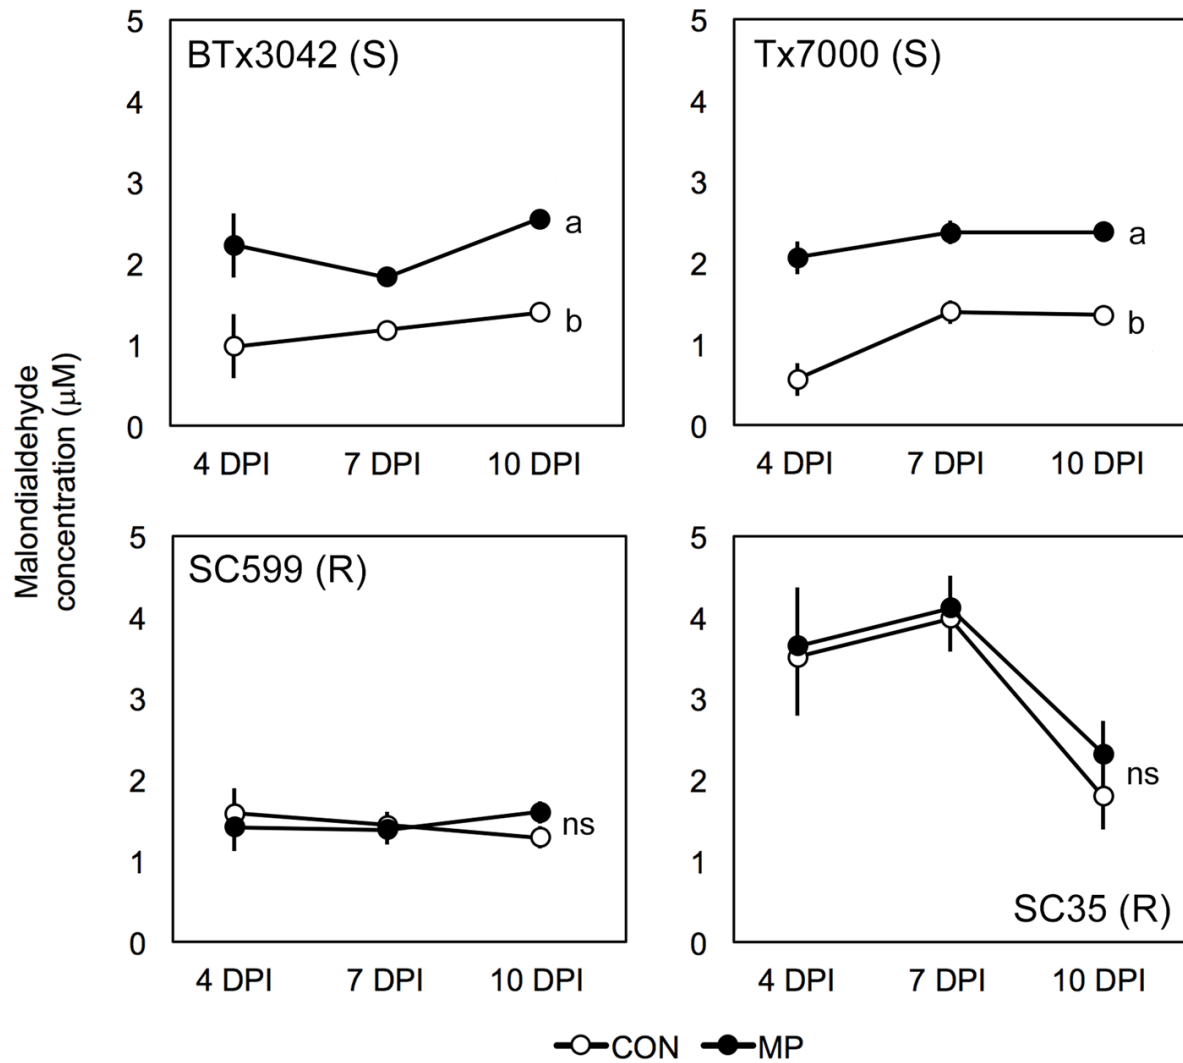

1140

**Supplementary Table 1.** Significantly ( $q < 0.05$ ) differentially expressed genes related to host oxidative stress and antioxidant system between SC599 (charcoal rot resistant) and Tx7000 (charcoal rot susceptible) sorghum genotypes in response to *Macrophomina phaseolina* inoculation at 7 days post inoculation.

| Gene annotation    | Metabolic pathway | Gene ID              | Geno × Trt*<br>q-value | SC599 (MP-CON)†      |         | Tx7000 (MP-CON)     |         |
|--------------------|-------------------|----------------------|------------------------|----------------------|---------|---------------------|---------|
|                    |                   |                      |                        | log <sub>2</sub> DE‡ | q-value | log <sub>2</sub> DE | q-value |
| Cytochrome P450    | Unknown           | <i>Sb03g032210</i>   | 9.3E-12                | 1.29                 | 0.1893  | -6.03               | 5.4E-06 |
|                    |                   | <i>Sb09g025490</i>   | 4.1E-03                | 0.48                 | 0.9194  | -5.87               | 1.2E-06 |
|                    |                   | <i>Sb06g015320</i>   | 1.7E-04                | 1.70                 | 0.2952  | -5.17               | 3.0E-04 |
|                    |                   | <i>Sb07g000550</i>   | 7.1E-03                | -                    | -       | -4.82               | 1.6E-04 |
|                    |                   | <i>Sb05g022010</i>   | 3.8E-03                | -                    | -       | -4.58               | 2.6E-03 |
|                    |                   | <i>Sb02g030640</i>   | 2.1E-02                | 0.88                 | 0.7566  | -3.63               | 3.2E-02 |
|                    |                   | <i>Sb03g003590</i>   | 1.1E-03                | 0.65                 | 0.7830  | -3.42               | 9.5E-05 |
|                    |                   | <i>Sb01g032440</i>   | 5.6E-04                | 2.22                 | 0.0601  | -3.18               | 6.8E-02 |
|                    |                   | <i>Sb04g000730</i>   | 1.4E-04                | 0.42                 | 0.8226  | -2.91               | 7.9E-04 |
|                    |                   | <i>Sb01g036360</i>   | 2.1E-04                | 0.00                 | 0.9992  | -2.79               | 5.4E-10 |
|                    |                   | <i>Sb2967s002010</i> | 9.2E-04                | 0.97                 | 0.4544  | -2.58               | 4.3E-05 |
|                    |                   | <i>Sb06g025990</i>   | 3.4E-06                | 0.64                 | 0.3355  | -2.39               | 3.6E-07 |
|                    |                   | <i>Sb01g035170</i>   | 1.8E-09                | 2.84                 | 0.0001  | -2.08               | 6.9E-09 |
|                    |                   | <i>Sb06g030010</i>   | 2.7E-06                | 0.91                 | 0.1931  | -1.58               | 1.8E-04 |
|                    |                   | <i>Sb03g037380</i>   | 1.9E-03                | 0.69                 | 0.5468  | -1.21               | 4.4E-05 |
|                    |                   | <i>Sb09g021890</i>   | 4.9E-02                | 1.06                 | 0.2254  | -0.22               | 5.9E-01 |
|                    |                   | <i>Sb08g019430</i>   | 3.0E-02                | -0.44                | 0.8043  | 1.01                | 1.7E-02 |
|                    |                   | <i>Sb01g007400</i>   | 1.1E-02                | -                    | -       | 1.74                | 4.6E-03 |
|                    |                   | <i>Sb02g022600</i>   | 2.1E-03                | -0.80                | 0.5789  | 1.94                | 1.7E-04 |
|                    |                   | <i>Sb03g042660</i>   | 2.5E-05                | -1.10                | 0.4289  | 1.98                | 4.2E-07 |
|                    |                   | <i>Sb08g019480</i>   | 1.1E-02                | -0.22                | 0.9559  | 2.34                | 8.3E-05 |
|                    |                   | <i>Sb03g002060</i>   | 1.9E-02                | 0.49                 | 0.7760  | 2.41                | 2.1E-07 |
|                    |                   | <i>Sb01g031080</i>   | 2.8E-05                | -1.41                | 0.2741  | 2.65                | 2.8E-09 |
|                    |                   | <i>Sb08g019470</i>   | 4.6E-02                | -                    | -       | 2.83                | 1.7E-02 |
|                    |                   | <i>Sb03g040280</i>   | 1.2E-02                | -0.35                | 0.9368  | 2.94                | 7.9E-06 |
|                    |                   | <i>Sb07g000520</i>   | 3.4E-04                | 0.57                 | 0.7335  | 3.53                | 3.9E-16 |
|                    |                   | <i>Sb10g004820</i>   | 3.8E-03                | -                    | -       | 3.65                | 6.4E-05 |
|                    |                   | <i>Sb02g043130</i>   | 1.6E-04                | 0.12                 | 0.9833  | 4.74                | 5.2E-15 |
|                    |                   | <i>Sb01g007420</i>   | 7.1E-09                | -1.16                | 0.2596  | 4.96                | 5.6E-15 |
|                    |                   | <i>Sb05g010360</i>   | 7.6E-10                | -1.45                | 0.2546  | 5.00                | 1.7E-30 |
| <i>Sb07g000510</i> | 1.1E-04           | 0.89                 | 0.3230                 | 5.46                 | 2.2E-06 |                     |         |
| <i>Sb01g017160</i> | 6.1E-20           | -2.51                | 0.0011                 | 5.90                 | 1.1E-32 |                     |         |

|                                                                   |                                              |                      |         |        |        |         |         |
|-------------------------------------------------------------------|----------------------------------------------|----------------------|---------|--------|--------|---------|---------|
|                                                                   |                                              | <i>Sb10g024663</i>   | 5.8E-16 | -0.79  | 0.4097 | 6.43    | 5.0E-10 |
|                                                                   |                                              | <i>Sb01g048030</i>   | 4.9E-02 | -      | -      | 6.75    | 8.3E-08 |
|                                                                   |                                              | <i>Sb07g008860</i>   | 2.2E-05 | -      | -      | 7.15    | 2.2E-09 |
|                                                                   |                                              | <i>Sb02g000220</i>   | 2.1E-06 | -2.03  | 0.1498 | 7.87    | 2.9E-64 |
|                                                                   |                                              | <i>Sb07g008870</i>   | 1.3E-03 | -      | -      | 8.27    | 2.2E-12 |
| NADPH oxidase                                                     | Apoplasic superoxide generation              | <i>Sb0621s002010</i> | 6.4E-05 | 0.61   | 0.7974 | -3.20   | 8.4E-29 |
| NADH dehydrogenase 1 alpha subcomplex, assembly factor 1          | Respiratory chain Complex I                  | <i>Sb03g033415</i>   | 1.1E-04 | -0.47  | 0.7917 | 2.14    | 3.6E-05 |
| NADH dehydrogenase iron-sulfur protein 4, mitochondrial precursor |                                              | <i>Sb02g037780</i>   | 9.4E-03 | -0.01  | 0.9979 | 0.97    | 1.8E-05 |
| Amine oxidase, flavin-containing, domain containing protein,      | Unknown                                      | <i>Sb01g044230</i>   | 1.4E-02 | 0.68   | 0.8358 | -4.96   | 1.8E-03 |
| Amine oxidase-related                                             |                                              | <i>Sb06g032450</i>   | 3.3E-03 | -0.68  | 0.4749 | 0.92    | 1.2E-03 |
| Copper methylamine oxidase precursor                              |                                              | <i>Sb06g032460</i>   | 1.3E-15 | -1.58  | 0.0617 | 4.10    | 1.5E-58 |
|                                                                   |                                              | <i>Sb07g005780</i>   | 8.0E-04 | -      | -      | -2.04   | 1.3E-03 |
|                                                                   |                                              | <i>Sb01g006160</i>   | 1.1E-03 | 1.04   | 0.2741 | -1.39   | 2.9E-03 |
|                                                                   |                                              | <i>Sb02g036990</i>   | 9.3E-12 | 2.52   | 0.0001 | -3.71   | 1.1E-03 |
|                                                                   |                                              | <i>Sb04g028410</i>   | 2.8E-06 | 0.61   | 0.6758 | -2.84   | 1.4E-12 |
|                                                                   | <i>Sb06g020020</i>                           | 1.7E-20              | -1.02   | 0.1013 | 3.33   | 6.1E-48 |         |
| <b>EC 1.14.13.39</b> , Nitric oxide synthase (NOS)                | Citrulline-nitric oxide cycle                | <i>Sb04g000530</i>   | 1.4E-02 | 0.42   | 0.7458 | -0.82   | 1.1E-02 |
|                                                                   |                                              | <i>Sb01g039180</i>   | 1.0E-03 | 0.78   | 0.7386 | -2.84   | 6.5E-04 |
|                                                                   |                                              | <i>Sb05g000240</i>   | 1.1E-02 | -      | -      | -3.11   | 7.4E-02 |
|                                                                   |                                              | <i>Sb07g024150</i>   | 4.2E-02 | -      | -      | -2.41   | 1.3E-01 |
|                                                                   |                                              | <i>Sb10g002510</i>   | 1.7E-04 | 0.67   | 0.3981 | -1.01   | 1.4E-04 |
|                                                                   |                                              | <i>Sb09g002030</i>   | 3.7E-02 | 1.02   | 0.6437 | -1.87   | 1.4E-02 |
| <b>EC 1.7.2.1</b> , Nitrite reductase (NO-forming)                | Nitrate reduction I                          | <i>Sb08g011530</i>   | 2.1E-11 | -1.37  | 0.4544 | 9.34    | 2.9E-76 |
|                                                                   |                                              | <i>Sb04g027860</i>   | 1.3E-02 | -0.42  | 0.9108 | 7.48    | 2.1E-31 |
|                                                                   |                                              | <i>Sb05g000680</i>   | 3.0E-03 | -      | -      | 4.00    | 7.0E-05 |
|                                                                   |                                              | <i>Sb03g039960</i>   | 7.7E-05 | -      | -      | 5.66    | 1.0E-11 |
|                                                                   |                                              | <i>Sb04g025630</i>   | 4.3E-02 | -0.49  | 0.4999 | 0.27    | 2.9E-01 |
| <b>EC 1.7.1.1</b> , NADH-cytochrome b5 reductase                  | Nitrate reduction II (assimilatory)          | <i>Sb09g023850</i>   | 2.4E-03 | -0.38  | 0.7270 | 1.04    | 7.2E-04 |
|                                                                   |                                              | <i>Sb07g022750</i>   | 2.9E-05 | 0.80   | 0.6184 | -2.71   | 3.6E-27 |
|                                                                   |                                              | <i>Sb07g026290</i>   | 1.1E-02 | 0.64   | 0.4211 | -0.75   | 4.2E-02 |
|                                                                   |                                              | <i>Sb04g007060</i>   | 1.4E-06 | 1.58   | 0.3029 | -5.19   | 5.1E-18 |
| Peroxidase activity                                               | H <sub>2</sub> O <sub>2</sub> detoxification | <i>Sb03g004380</i>   | 1.1E-03 | -      | -      | -6.32   | 3.9E-27 |
|                                                                   |                                              | <i>Sb10g010040</i>   | 2.2E-02 | -0.06  | 0.9950 | -4.85   | 9.3E-04 |
|                                                                   |                                              | <i>Sb09g024590</i>   | 2.0E-06 | 0.22   | 0.9588 | -4.31   | 2.2E-08 |
|                                                                   |                                              | <i>Sb10g021610</i>   | 4.0E-05 | 0.10   | 0.9837 | -4.14   | 6.1E-16 |
|                                                                   |                                              | <i>Sb01g031740</i>   | 2.2E-02 | -      | -      | -4.08   | 1.0E-02 |
|                                                                   |                                              | <i>Sb08g016840</i>   | 3.3E-03 | -      | -      | -3.58   | 3.3E-05 |

|                      |                                              |                    |         |       |        |       |         |
|----------------------|----------------------------------------------|--------------------|---------|-------|--------|-------|---------|
|                      |                                              | <i>Sb05g009400</i> | 1.7E-02 | -     | -      | -3.33 | 5.4E-02 |
|                      |                                              | <i>Sb04g008590</i> | 2.7E-02 | -     | -      | -2.89 | 1.0E-01 |
|                      |                                              | <i>Sb10g027490</i> | 3.5E-02 | 0.34  | 0.9445 | -2.66 | 2.8E-03 |
|                      |                                              | <i>Sb06g027520</i> | 5.0E-04 | 0.93  | 0.2159 | -2.08 | 1.3E-03 |
|                      |                                              | <i>Sb06g027520</i> | 5.0E-04 | 0.93  | 0.2159 | -2.08 | 1.3E-03 |
|                      |                                              | <i>Sb02g037840</i> | 4.9E-03 | 1.55  | 0.2380 | -1.96 | 8.4E-02 |
|                      |                                              | <i>Sb04g003240</i> | 3.3E-02 | 0.31  | 0.9327 | -1.70 | 1.1E-07 |
|                      |                                              | <i>Sb04g030170</i> | 1.9E-03 | 0.07  | 0.9719 | -0.97 | 1.4E-03 |
|                      |                                              | <i>Sb03g010250</i> | 7.6E-03 | 1.58  | 0.1351 | -0.80 | 2.9E-01 |
|                      |                                              | <i>Sb08g004880</i> | 3.0E-02 | -0.28 | 0.8646 | 0.73  | 1.7E-02 |
|                      |                                              | <i>Sb08g016820</i> | 8.7E-03 | -1.08 | 0.2781 | 1.01  | 2.6E-02 |
|                      |                                              | <i>Sb05g001030</i> | 3.4E-02 | -0.39 | 0.8267 | 1.08  | 2.2E-02 |
|                      |                                              | <i>Sb09g004650</i> | 3.3E-03 | -1.06 | 0.4214 | 1.57  | 9.0E-05 |
|                      |                                              | <i>Sb09g004660</i> | 3.5E-02 | -     | -      | 1.72  | 3.1E-01 |
|                      |                                              | <i>Sb10g028500</i> | 4.8E-02 | 0.36  | 0.9018 | 2.29  | 3.2E-07 |
|                      |                                              | <i>Sb03g036760</i> | 1.8E-07 | -1.33 | 0.1929 | 2.92  | 2.8E-05 |
|                      |                                              | <i>Sb09g020960</i> | 3.8E-02 | -     | -      | 3.35  | 2.2E-02 |
|                      |                                              | <i>Sb03g046760</i> | 1.4E-06 | -0.60 | 0.8320 | 3.94  | 1.5E-64 |
|                      |                                              | <i>Sb06g030940</i> | 1.2E-04 | -     | -      | 5.27  | 1.9E-04 |
|                      |                                              | <i>Sb05g001000</i> | 2.6E-10 | -     | -      | 6.07  | 1.4E-08 |
|                      |                                              | <i>Sb09g021000</i> | 5.3E-04 | -     | -      | 6.13  | 4.5E-06 |
|                      |                                              | <i>Sb01g020830</i> | 2.9E-08 | -0.56 | 0.8097 | 6.17  | 1.1E-21 |
|                      |                                              | <i>Sb03g013200</i> | 4.2E-04 | -     | -      | 7.65  | 1.0E-10 |
|                      |                                              | <i>Sb01g041760</i> | 3.4E-04 | -     | -      | 9.28  | 8.2E-27 |
| Catalase             | H <sub>2</sub> O <sub>2</sub> detoxification | <i>Sb01g048280</i> | 1.5E-04 | 1.10  | 0.3804 | -3.23 | 1.2E-06 |
| Superoxide dismutase | Superoxide dismutation                       | <i>Sb07g023950</i> | 2.1E-02 | 1.07  | 0.1760 | -0.27 | 4.4E-01 |

\*Geno × Trt = genotype by treatment interaction where treatment consists of *M. phaseolina* and control inoculations. †MP = *M. phaseolina*, CON = control. ‡ log<sub>2</sub> DE = log<sub>2</sub> fold differential expression.
